1  
2  
3  
4  
5  
6  
7  
8  
9  
10  
11  
12  
13  
14  
15  
16  
17  
18  
19  
20  
21  
22  
23

# A novel mechanism of bulk cytoplasmic transport by cortical dynein in *Drosophila* ovary

Wen Lu, Margot Lakonishok, Anna S. Serpinskaya, Vladimir I. Gelfand\*

Department of Cell and Developmental Biology, Feinberg School of Medicine,  
Northwestern University, Chicago, IL 60611

\*Correspondence: [vgelfand@northwestern.edu](mailto:vgelfand@northwestern.edu)

## Abstract

Cytoplasmic dynein, a major minus-end directed microtubule motor, plays essential roles in eukaryotic cells. *Drosophila* oocyte growth is mainly dependent on the contribution of cytoplasmic contents from the interconnected sister cells, nurse cells. We have previously shown that cytoplasmic dynein is required for *Drosophila* oocyte growth, and assumed that it transports cargoes along microtubule tracks from nurse cells to the oocyte. Here we report that instead transporting cargoes along microtubules into the oocyte, cortical dynein actively moves microtubules in nurse cells and from nurse cells to the oocyte via the cytoplasmic bridges, the ring canals. We demonstrate this microtubule movement is sufficient to drag even inert cytoplasmic particles through the ring canals to the oocyte. Furthermore, replacing dynein with a minus-end directed

24 plant kinesin linked to the actin cortex is sufficient for transporting organelles and  
25 cytoplasm to the oocyte and driving its growth. These experiments show that cortical  
26 dynein can perform bulk cytoplasmic transport by gliding microtubules along the cell  
27 cortex and through the ring canals to the oocyte. We propose that the dynein-driven  
28 microtubule flow could serve as a novel mode of cargo transport for fast cytoplasmic  
29 transfer to support rapid oocyte growth.

## 30 **Introduction**

31           Microtubules perform many key cellular functions, such as cell division,  
32 migration, polarization/compartimentation, and intracellular long-range cargo transport.  
33 Cytoplasmic dynein (referred simply as dynein hereafter) is the major minus-end  
34 directed microtubule motor, and involved in numerous microtubule-based functions <sup>1</sup>. In  
35 interphase cells, dynein is the main motor responsible for transporting various cargoes  
36 towards the microtubule minus-ends <sup>2</sup>. In dividing cells, dynein functions at  
37 kinetochores, spindle poles, and at the cell cortex. Particularly, cortical dynein pulls  
38 astral microtubules and is therefore required for positioning the mitotic spindles <sup>3,4</sup>.

39           The core dynein complex contains two copies of heavy chain (DHC),  
40 intermediate chain (DIC), intermediate light chain (DLIC) and three different dynein light  
41 chains (Roadblock, LC8/Cut up and Tctex/Dlc90F) <sup>2,5</sup> (Figure. 1A). Dynein heavy chain  
42 contains a ring of six AAA+ domains, and ATP hydrolysis-induced conformational  
43 change results in dynein walking towards the minus-ends of microtubules <sup>6</sup>. The activity  
44 of dynein is regulated by the dynactin complex including the largest subunit  
45 p150<sup>Glued</sup>/DCTN1 <sup>7</sup>, and the Lis1-NudE complex <sup>8</sup>, as well as several activating  
46 adaptors, such as BICD2/BICDL1, Spindly and HOOK1/3 <sup>2,5,9</sup> (Figure. 1A).

47           Dynein has a number of essential functions during *Drosophila* oogenesis. First, it  
48 is required for germline cell division and oocyte specification <sup>10,11</sup>. During mid-  
49 oogenesis, dynein is required for transport of mRNA ribonucleoproteins (RNPs) and  
50 organelles from nurse cells to the oocyte <sup>12-15</sup>. Within the oocyte, dynein transports and  
51 anchors the anterior and dorsal determinants that are critical for axis determination for

52 future embryos<sup>16-18</sup>. During vitellogenesis, dynein in the oocyte regulates endocytic  
53 uptake and maturation of yolk proteins from the neighboring somatic follicle cells<sup>19</sup>.

54 The *Drosophila* oocyte undergoes dramatic cell growth and polarization during  
55 oogenesis<sup>20</sup>. Remarkably, the oocyte remains transcriptionally quiescent during most of  
56 the oogenesis. For its dramatic growth, the oocyte relies on its interconnected sister  
57 cells, nurse cells, for providing mRNAs, proteins, and organelles through intercellular  
58 cytoplasmic bridges called ring canals<sup>20,21</sup>. Previously, we showed that dynein heavy  
59 chain drives oocyte growth by supplying components to the growing oocyte<sup>15</sup>. Here, we  
60 study the mechanism of dynein-dependent transport of cargoes from nurse cells to the  
61 oocyte. Surprisingly, we find that microtubules, which had previously been considered  
62 as static tracks for dynein<sup>12-15</sup>, are robustly moved by dynein within the nurse cell  
63 cytoplasm, and more remarkably, from the nurse cell to the oocyte. We further  
64 demonstrate that this dynein-powered microtubule gliding creates cytoplasmic flow  
65 carrying cargoes in bulk to the oocyte, including neutral particles that do not interact  
66 with motors. Furthermore, we show that a gliding-only chimeric minus-end motor  
67 anchored to the cortex is sufficient to support transport of cargoes to the oocyte, and  
68 therefore the oocyte growth. Altogether, we describe here a novel mechanism for  
69 dynein-driven cytoplasmic transport: cortically-anchored dynein drives microtubule  
70 gliding, and microtubules in turn move cytoplasmic contents in nurse cells and through  
71 the ring canals, driving oocyte growth. This provides a fast and efficient mode of bulk  
72 transport of a wide variety of components supplied by nurse cells to the oocyte.

## 73 **Results**

### 74 **Dynein is required for oocyte growth**

75           The growing *Drosophila* oocyte is transcriptionally silent and mostly relies on its  
76 interconnected sister nurse cells for mRNAs, proteins, and organelles<sup>20,21</sup>. Dynein, as  
77 the main minus-end directed microtubule motor in *Drosophila*, has been implicated in  
78 nurse cell-to-oocyte transport<sup>12-15</sup>.

79           Here we investigated the roles of the dynein complex and its regulators in oocyte  
80 growth by taking advantage of a germline-specific Gal4, maternal  $\alpha$  tubulin-Gal4<sup>[V37]</sup>,  
81 that is expressed in germline cells after the completion of cell division and oocyte  
82 specification<sup>15,22</sup>. This approach bypasses the requirement for dynein in early  
83 oogenesis. Knockdown of dynein by expressing either RNAi against dynein components  
84 (DHC, DLIC, Lis1) or a dominant negative construct of p150<sup>Glued</sup>/DCTN1 (*p150<sup>Glued</sup> $\Delta$ C*)<sup>12</sup>  
85 driven by this Gal4 line allowed for normal cell division and oocyte specification but  
86 caused complete arrest of oocyte growth (hereafter referred as the “small oocyte”  
87 phenotype) (Figure 1B-1D”; Supplementary Figure 1A). In spite of the growth inhibition  
88 caused by dynein knockdown, we found that the oocyte marker, Orb (oo18 RNA-binding  
89 protein)<sup>23</sup> is properly concentrated in the early oocytes, emphasizing that our approach  
90 does not interfere with germline cell division or oocyte specification during early  
91 oogenesis. However, Orb is clearly dispersed from the small oocytes at later stages  
92 (stages 8-9) (Figure 1C”-1D” and 1E;), implying defects of nurse cell-to-oocyte  
93 transport. These data demonstrate that dynein core components and regulators are  
94 indeed essential for oocyte growth, likely via transporting cargoes into the oocyte.

95           As dynein activity relies on various cargo activating adaptors, we knocked down  
96 the *Drosophila* homologs of three main dynein cargo-specific adaptors, BicD, Spindly,  
97 and Hook<sup>9,24</sup> by RNAi in the germ line. Among the three adaptors, knockdown of BicD  
98 results in complete small oocytes, while *Spindly-RNAi* and *hook-RNAi* do not cause  
99 obvious oocyte growth defects (Figure 1F).

100           This lack of oocyte growth phenotype in *Spindly-RNAi* and *hook-RNAi* animals is  
101 not due to low efficiency of the RNAi lines themselves, as RNAi knockdown of Spindly  
102 and Hook display typical loss-of-function mutant phenotypes of these adaptors.  
103 Maternal knockdown of Spindly (*mat atub[V37]>Spindly-RNAi*) caused all embryos to  
104 fail to hatch (N>200) and zygotic knockdown using a strong ubiquitous Gal4 (*Actin5C-*  
105 *Gal4*) led to 0% eclosion rate from *Spindly-RNAi* pupae (Supplementary Figure 1B)<sup>25</sup>.  
106 Hook is not required for fly viability or fertility, but is required for proper bristle formation  
107<sup>26</sup>, and *hook-RNAi* animals phenocopied the classic hooked-bristle phenotype observed  
108 in *hook* null allele (*hook<sup>11</sup>*) (Supplementary Figure 1C-1E')<sup>26</sup>.

109           This set of data leads us to conclude that BicD is the most important dynein  
110 activating adaptor for *Drosophila* oocyte growth.

111

## 112 **Dynein drives microtubule gliding in nurse cells**

113           Having established that dynein and its associated proteins are required for  
114 oocyte growth, we next examined dynein tracks, cytoplasmic microtubules. Microtubules  
115 are localized inside the intercellular cytoplasmic bridges, the ring canals (Figure 2A-  
116 A'''), consistent with previous reports<sup>12-15</sup>. However, when we examined the dynamics

117 of microtubules in live samples using photoconversion<sup>27-29</sup>, we surprisingly discovered  
118 that microtubules in the nurse cells are not stationary; they move and snake around in  
119 the nurse cells (Figure. 2B-2B'; Video 1). Robust microtubule movement in nurse cells  
120 can also be seen with fluorescently labeled microtubule-associated proteins (MAPs),  
121 EMTB-TagRFP<sup>30</sup>, GFP-Patronin<sup>15,30</sup>, and Jupiter-GFP<sup>15,27,28,30,31</sup> (Videos 2-4). Even  
122 more remarkably, microtubules are seen moving from the nurse cell to the oocyte  
123 through the ring canal, which most robustly occurs in stage 9 egg chambers (Figure 2D-  
124 2F; Videos 2-4). Altogether, we conclude that microtubules are not static tracks for  
125 dynein; instead, they actively move within the nurse cells and from the nurse cell to the  
126 oocyte.

127         When the *Drosophila* egg chambers reach stages 10B-11, nurse cells transfer all  
128 their cytoplasmic contents to the oocytes, the process called nurse cell dumping<sup>21,32</sup>.  
129 We examined whether the microtubule movement in the ring canals and associated  
130 oocyte growth during mid-oogenesis is a result of an early slow form of nurse cell  
131 dumping. We first measured the nurse cell size between stage 8 to stage 10 and found  
132 that nurse cells still undergo dramatic growth during this phase (Supplementary Figure  
133 2A). This nurse cell growth from stage 8 to stage 10 is quite distinct from the dumping  
134 phase, during which nurse cells squeeze their cytoplasm to the oocyte and thus shrink  
135 quickly in size<sup>33</sup>

136         Second, nurse cell dumping requires non-muscle myosin-II activity<sup>34,35</sup>. We  
137 tested whether myosin-II activity is required for stage 9 microtubule movement and  
138 overall oocyte growth. We used a RNAi line against the myosin-II heavy chain Zipper  
139 (*zip-RNAi*) to knockdown myosin-II activity, and an antibody recognizing phosphorylated

140 myosin-II regulatory light chain (p-MRLC, Ser19) as a readout of myosin-II activity<sup>35,36</sup>.  
141 We found that that myosin-II activity is dramatically diminished in *zip-RNAi* egg  
142 chambers (Supplementary Figure 2B-2C'), suggesting that the *zip-RNAi* does inhibit  
143 myosin-II activity efficiently. However, we found that *zip-RNAi* does not inhibit  
144 microtubule movement in the nurse cell-oocyte ring canals (Video 6). Furthermore, *zip-*  
145 *RNAi* shows no defects in oocyte growth or Orb concentration from early to mid-  
146 oogenesis (Supplementary Figure 2D-2G). Additionally, we induced germline clones of  
147 a loss-of-function allele of *zip* (*zip<sup>2</sup>*)<sup>37</sup>, and found that the majority of *zip<sup>2</sup>* mutant egg  
148 chambers with proper oocyte specification can develop to mid-oogenesis without  
149 obvious delay in oocyte growth (25 out of 28 egg chambers; Supplementary Figure 2H-  
150 2K). This is consistent with previous reports showing that the myosin-II light chain  
151 *spaghetti squash* (*sqh*) mutants<sup>34,35</sup> and the “dumpleless” mutants, such as chickadee,  
152 E2F, and RAP150B, develop normally to stage 10 without major oocyte growth defects  
153<sup>38-40</sup>. Thus, we conclude that the microtubule movement through ring canals is not a part  
154 of myosin-II-driven nurse cell dumping; it truly represents a novel process of nurse cell-  
155 to-oocyte transport in mid-oogenesis.

156 Dynein is known to glide microtubules *in vitro* and *in vivo*<sup>41</sup>. Therefore, we asked  
157 whether dynein is the motor that moves microtubules in nurse cells. Knockdown of  
158 dynein using the *Dhc64C-RNAi* line results in a complete inhibition of microtubule  
159 movement within the nurse cells (Figure 2C-2C'; Video 5). The microtubules in *dynein-*  
160 *RNAi* nurse cells are noticeably less curved than the control ones, implying no motors  
161 applying forces on them. More importantly, the motility of microtubules in the nurse cell-  
162 oocyte ring canals are dramatically reduced in *dynein-RNAi* (Video 6). In contrast, we



163 found that the microtubule movement through the ring canal is not affected by myosin-II  
164 inhibition (Video 6). Altogether these data support the idea that dynein glides  
165 microtubules in nurse cells and through ring canals to the oocyte.

166

### 167 **Microtubule flow carries cargoes to the oocyte**

168 In addition to microtubule motility, we also observed cytoplasmic flow as well as  
169 synchronized movement of cargoes through nurse cell-to-oocyte ring canals in stage 9  
170 egg chambers (Figure 2G-2H; Videos 7-8). Furthermore, cargo bulk movement is  
171 dynein-dependent and myosin-II-independent (Video 9). This raises the possibility that,  
172 in addition to the previously-proposed canonical cargo transport mode (Figure 3A),  
173 dynein-powered microtubule gliding could create cytoplasmic flow carrying all types of  
174 cargoes from nurse cells to the oocyte (Figure 3B).

175 Therefore, to test this possibility, we simultaneously imaged both microtubules  
176 and organelles (mitochondria or Golgi units) in the nurse cell-oocyte ring canals, and  
177 found that they move together with microtubules through the ring canal to the oocyte  
178 (Videos 10-11). This suggests that mitochondria, Golgi units and probably other classes  
179 of cargoes could be carried through ring canals in bulk by microtubules gliding towards  
180 the oocyte (Figure 3B).

181 However, we cannot completely exclude the possibility that the motors attached  
182 to the cargoes walk on these moving microtubules and thus co-transport cargoes and  
183 microtubules through the ring canal. Thus, we decided to examine whether neutral  
184 cargoes that normally are not transported by motors along microtubules can also be  
185 transported to the oocyte. We used Genetically Encoded Multimeric nanoparticles

186 (GEMs) (Figure 3C), which self-assemble into ~40 nm fluorescent spheres<sup>42</sup>. In  
187 *Drosophila* S2R+ cells, GEMs form bright compact particles and display mostly  
188 Brownian motion, which is very distinctive from typical movements of endogenous  
189 motor-driven organelles, such as lysosomes (Supplementary Figure 3). However, when  
190 we expressed GEMs in *Drosophila* ovaries, we found that they move within nurse cells  
191 in a fast linear manner (Figure 3D-D'; Video 12). More importantly, GEMs move through  
192 the nurse cell-oocyte ring canal (Video 13) and concentrate in the oocytes (Figure 3D  
193 and 3F-3G). Knockdown of dynein dramatically diminishes GEM linear movements and  
194 eliminates GEM accumulation in the oocyte (Figure 3E-3K; Video 12). Altogether, we  
195 demonstrate that the direct dynein-cargo interaction is not necessary for nurse cell-to-  
196 oocyte transport, and neutral particles can be efficiently carried through the ring canals  
197 by dynein-driven microtubule movement.

198

### 199 **Microtubule gliding delivers cargoes to oocytes**

200 Next we investigated whether cortical dynein glides microtubules in nurse cells  
201 and transport cargoes to the oocyte. We first examined dynein localization using either  
202 a GFP-tagged Dlic transgenic line or an antibody against *Drosophila* dynein heavy chain  
203 and found a clear cortical localization of dynein in the nurse cells after the soluble pool  
204 of dynein is extracted by detergent (Supplementary Figure 4A-4D).

205 Then we tested whether a cortically-anchored minus-end-directed motor is  
206 sufficient to drive oocyte growth. To constrain dynein activity to cell cortex, we replaced  
207 the endogenous dynein activating adaptor BicD with an ectopically expressed BicD that

208 is cortically-recruited by an actin-targeting motif, F-Tractin<sup>43</sup> (Supplementary Figure 4E-  
209 F'). Compared to *BicD-RNAi* in which no egg chambers developed passing stage 7, this  
210 cortically-recruited BicD construct allows >70% ovarioles to have egg chambers  
211 reaching mid-oogenesis with proper Orb concentration (Figure 4A-4D). In contrast,  
212 expression of a tdTomato-tagged F-Tractin alone<sup>43</sup> (not fused with BicD) did not rescue  
213 the oocyte growth defects in *BicD-RNAi* (Figure 4D), indicating that the rescue we  
214 observed with F-Tractin-BicD is not due to Gal4 activity dilution or F-Tractin  
215 overexpression.

216 To further test the idea that gliding microtubules drive nurse cell-to-oocyte  
217 transport, we created an artificial minus-end gliding-only motor. It contains a dimer  
218 motor region of a fast minus-end-directed plant kinesin-14, kin14Vib<sup>44-46</sup>, and is  
219 targeted to cell cortex with the F-Tractin probe (Supplementary Figure 4E). This  
220 chimeric kinesin-14 motor, unlike dynein, cannot carry endogenous *Drosophila* cargoes,  
221 allowing us to test whether microtubule gliding alone is sufficient for moving organelles  
222 to the oocyte and support the oocyte growth. With this chimeric gliding-only kinesin-14  
223 motor, we found that oocyte growth is partially rescued (Figure 4E-4G and 4K). In  
224 addition to the oocyte size rescue, we also found that in more than 95% of the samples,  
225 the kinesin-14 motor is able to maintain Orb concentration in the oocyte of stage 8~9  
226 egg chambers (Figure 4H-4J and 4L). The rescues of both oocyte growth and oocyte  
227 Orb concentration imply that the gliding-only motor restores the nurse cell-to-oocyte  
228 transport.

229 Therefore, we directly examined mitochondria movement in the kinesin-14  
230 rescued samples. We observed highly motile mitochondria in nurse cells, and

231 synchronized mitochondria movement from the nurse cells to the oocyte, highly  
232 resembling mitochondrial flow in control ring canals (Video 14).

233 In summary, we show that cortically-anchored microtubule minus-end motors that  
234 cannot directly transport cargoes drive oocyte growth, further supporting our model that  
235 dynein-driven microtubule gliding powers cytoplasmic flow from the nurse cells to the  
236 oocyte (Figure 5; Video 15).

237

### 238 **C-terminus of dynein light intermediate chain is sufficient for nurse cell cortical** 239 **localization**

240 Having established that cortically anchored dynein is the key to glide  
241 microtubules and deliver cargoes to the growing oocyte, we decided to investigate how  
242 dynein is anchored to the nurse cell cortex. As we observed the cortical localization of  
243 Dlic-GFP in nurse cells (Supplementary Figure 4B), we decided to make N-terminal and  
244 C-terminal truncations of Dlic (DlicNT and DlicCT; Supplementary Figure 5A) and  
245 examine their localizations in the germ line. The Dlic N-terminus carries a GTPase-like  
246 domain and is known to interact with dynein heavy chain via a patch of conserved  
247 aromatic residues<sup>47</sup>. The C-terminal Dlic contains the effector-binding domain that  
248 interact with BICD, Spindly and Hook-family activating adaptors to form a stable  
249 processive dynein-dynactin complex<sup>24</sup>. We tagged the DlicNT and DlicCT with an  
250 optogenetic system LOVTRAP<sup>48</sup>, and in dark LOVTRAP probes bring the two Dlic  
251 truncations together (Supplementary Figure 5A-5B). We found that the DlicNT-DlicCT  
252 complex in dark is sufficient to rescue the oocyte growth defects caused by *Dlic-RNAi*

253 (Supplementary Figure 5C), indicating that the Dlic truncations are functional in the  
254 germ line. While DlicNT appears diffused in germline cytoplasm, DlicCT shows a strong  
255 cortical localization in the nurse cells (Supplementary Figure 5D-5E).

256 Since the DlicCT is known to interact with dynein activating adaptors [47] and  
257 BicD is the most important activating adaptor for oocyte growth (Figure 1F), we then  
258 tested whether BicD is required for the localization of DlicCT to the nurse cell cortex. In  
259 *BicD-RNAi* background, DlicCT still localizes to the cortex and mostly evidently at the  
260 ring canal regions (Supplementary Figure 5F), indicating that BicD is not essential for  
261 recruiting Dlic to the nurse cell cortex.

262 The dynactin complex includes a short actin-like filament composed of actin  
263 related proteins (Arp1 and Arp11) and  $\beta$ -actin that can potentially links dynein to the cell  
264 cortex. Previous studies in mitosis revealed that the dynactin complex facilitates dynein  
265 localization at the cell cortex for spindle pulling and positioning<sup>49,50</sup>. Therefore, we  
266 examined the DlicCT localization in the dominant negative p150<sup>Glued</sup>/DCTN1 mutant  
267 (*p150<sup>Glued</sup> $\Delta$ C*) and found that the DlicCT localization is still predominantly cortical with  
268 the inhibition of the dynactin complex (Supplementary Figure 5G). On the other hand,  
269 Lis1 has been shown to localize at the oocyte cortex and it is required to recruit dynein  
270 to the oocyte cortex<sup>51</sup>. However, we found that the cortical localization of DlicCT in  
271 nurse cells is not affected by *Lis1-RNAi* (Supplementary Figure 5H).

272 In conclusion, Dlic C-terminus could facilitate the dynein complex to localize to  
273 the nurse cell cortex, independent of the dynein activating components (BicD, dynactin  
274 and Lis1). We propose that Dlic links the dynein heavy chain to the cell cortex and thus  
275 essential for microtubule gliding in nurse cells (Figure 5).

276

## 277 **Discussion**

278           As the main microtubule minus-end directed motor in animal cells, cytoplasmic  
279 dynein is responsible for a wide variety of cellular functions, ranging from cell division to  
280 intracellular transport. In *Drosophila* ovary, dynein plays an essential role in nurse cell-  
281 to-oocyte transport of mRNAs and organelles<sup>12-15</sup>. This was logically attributed to the  
282 conventional mode of dynein-driven transport: the motor attached to the cargo moves  
283 on microtubule tracks located inside ring canals and carries cargoes to the oocyte  
284 (Figure 3A).

285           In this study, we reveal a novel mechanism of bulk cargo transport by  
286 cytoplasmic dynein. First, we show that dynein core components and its regulatory  
287 cofactors are required for *Drosophila* oocyte growth (Figure 1). By imaging microtubules  
288 in live ovaries, we demonstrate that microtubules are actively moved by dynein from  
289 nurse cells to the growing oocytes (Figure 2). Furthermore, we use an artificial cargo  
290 that does not bind motors and show that direct dynein-cargo interaction is not necessary  
291 for the cargo movement in nurse cells or its transporting to the oocyte (Figure 3),  
292 supporting a passive “go-with-the-flow” mechanism underlying cytoplasm transfer from  
293 nurse cells to the oocyte. Lastly, we build a chimeric gliding-only motor by anchoring a  
294 minus-end plant kinesin, kin14V1b to the cortex, and find that this chimeric motor is  
295 sufficient to drive organelle transport and oocyte growth (Figure 4). Therefore, we  
296 propose a novel mechanism of dynein for bulk cargo transport: cortically-anchored  
297 dynein glides microtubules in the nurse cells; in turn these gliding microtubules move

298 cytoplasmic contents within the nurse cells and from the nurse cells to the oocyte  
299 through the ring canals (Figure 5; Video 15).

300

### 301 **A novel phase of nurse cell-to-oocyte transport**

302 Previously, nurse cell-to-oocyte transport has been divided into two phases: the  
303 early slow selective phase and the late fast non-selective phase<sup>21,32</sup>. The early phase is  
304 characterized by dynein-driven cargo transport along microtubules to the oocyte<sup>12-15</sup>.  
305 The late massive nurse cell-to-oocyte transport phase is known as nurse cell dumping,  
306 which occurs at late stage 10B to stage 11<sup>21,32</sup>.

307 Here we report a new phase of cytoplasmic flow driven by microtubules that are  
308 transported by cortical dynein from nurse cells to the oocyte. This occurs between the  
309 two previously-described phases, slow selective transport and fast nurse dumping. As  
310 microtubules can drag adjacent contents in the viscous cytoplasm<sup>29,52</sup>, we believe that  
311 this transport is non-selective. This conclusion is supported by the fact that the neutral  
312 particles (GEMs) are moved in the nurse cells and concentrated in the oocyte by  
313 dynein. Furthermore, we have found that a chimeric gliding-only motor unrelated to  
314 dynein, kinesin-14, is able to rescue mitochondria transport from the nurse cell to the  
315 oocyte (Video 14). As we use a motor domain of a moss kinesin-14 that has no known  
316 homology with the motor proteins that interact the mitochondrial adaptor protein Milton  
317 (e.g., KHC and Myosin 10A)<sup>53,54</sup>, we conclude that the flow created by microtubule  
318 movement in the ring canals is not cargo-specific, and it is different from the early  
319 selective transport phase.

320           During the dumping phase, nurse cells “squeeze” all the cytoplasmic contents to  
321 the oocyte, which is caused by non-muscle myosin-II contraction<sup>33,35</sup>, and associated  
322 with fast cytoplasmic streaming occurring in the oocyte mixing the dumped contents  
323 with the ooplasm<sup>21,52,55</sup>. We reason that the dynein-driven microtubule flow we  
324 observed is distinct from nurse cell dumping: (1) it occurs prior to nurse cell dumping  
325 and ooplasmic streaming (stages 8~9 versus stages 10B-11); (2) the nurse cell size  
326 grows drastically during microtubule flow stages (Supplementary Figure 2A), instead of  
327 fast shrinking associated with nurse cell dumping; (3) it requires cytoplasmic dynein,  
328 instead of myosin-II activity (Supplementary Figure 2; Videos 6 and 9); (4) the  
329 “dumpleless” mutants develop normally without major oocyte growth defects to stage 10  
330<sup>38-40</sup>, which is noticeably different from the small oocyte phenotype we observed in  
331 dynein knockdown (Figure 1).

332           Therefore, the dynein-microtubule driven bulk cargo flow from nurse cells to the  
333 oocyte presents a novel phase between early selective transport and late non-selective  
334 dumping, which is essential for *Drosophila* oocyte growth.

335

### 336 **Dynein anchorage at the cell cortex**

337           In this study, we found that cortical dynein glides microtubules to create local  
338 cytoplasmic flow and move cargoes to the growing oocyte. Furthermore, we found that  
339 the C-terminus of dynein light intermediate chain (DlicCT) is sufficient to target to the  
340 nurse cell cortex. DlicCT contains the effector-binding domain that interacts with  
341 multiple dynein activating adaptors<sup>24</sup>. Recently, our lab reported that Spindly, a dynein  
342 activating adaptor that interacts with DlicCT<sup>24</sup> and recruits dynein to the kinetochore in



343 mitosis<sup>25</sup>, anchors dynein to cortical actin in axons, thus pushing microtubules of the  
344 wrong polarity out of the axons in *Drosophila* neurons<sup>56</sup>. However, knockdown of  
345 Spindly does not disrupt dynein-dependent oocyte growth (Figure 1F). Thus, it indicates  
346 that the ovary uses a different mechanism for dynein cortical targeting. We showed that  
347 cortically-recruited BicD is able to rescue the oocyte growth arrest caused by *BicD-RNAi*  
348 (Figure 4A-4D), implying that BicD could contribute to the linkage between dynein and  
349 the cortex. Other studies also have suggested that the dynactin complex and Lis1 are  
350 involved in dynein cortical anchorage<sup>49-51</sup>. Nevertheless, DlicCT cortical localization is  
351 unaffected after inhibition of BicD, dynactin/p150 or Lis1 (Supplementary Figure 5E-5H),  
352 again indicating a novel mechanism of anchoring dynein to the cortex in nurse cells.  
353 Intriguingly, Dlic physically interacts with the *Drosophila* Par-3 homolog, Bazooka (Baz),  
354 in the ovary<sup>57</sup>, and Baz is a known cortical landmark protein in ovary and bind other  
355 cortical proteins, such as  $\beta$ -catenin (Armadillo) and DE-Cadherin (Shotgun)<sup>58-60</sup>. Thus,  
356 it is tempting to propose that Bazooka is the key to anchor the dynein complex to the  
357 nurse cell cortex via its interaction with Dlic and thus allows dynein to glide microtubules  
358 along the cortex.

359 We consistently observe cytoplasmic flow from the nurse cells to the oocyte in  
360 stage 9 egg chambers, suggesting a direction-controlling mechanism underlying the  
361 persistent oocyte growth. We speculate that the flow directionality could be attributed to  
362 different levels of dynein gliding activity. The dynein complex is strongly localized to the  
363 nurse cell cortex, but to a much lesser extent to the oocyte cortex (Supplementary  
364 Figure 4). Consistent with the dynein localization, microtubules are more cortically  
365 localized in the nurse cells than in the oocyte (Figure 2F). This differences in dynein

366 localization and microtubule organization may result in a higher dynein-driven  
367 microtubule gliding activity in the nurse cells, and therefore creates the directional flow  
368 through the ring canals to the growing oocyte.

369         Alternatively, this directionality could be controlled by the gatekeeper protein  
370 Short stop (Shot). Recently, we demonstrated that Shot is asymmetrically localized at  
371 actin fibers of ring canals on the nurse cell side and controls the cargo transport  
372 directionality between nurse cells and the oocyte<sup>15</sup>. Given the nature of Shot's  
373 microtubule-actin crosslinking activity, it could serve as an organizer of microtubules  
374 along the actin filaments of the ring canals on the nurse cell side and facilitate their  
375 transport towards the oocyte.

376

### 377 **The “go-with-the-flow” mechanism of cytoplasmic transport**

378         Here we report that the minus-end directed motor, cytoplasmic dynein, glides  
379 microtubules, and microtubules in turn stir the cytoplasm and transfer cytoplasmic  
380 contents from nurse cells to the oocyte. To our knowledge, this is the first report of  
381 microtubule gliding by cortical dynein driving cargo movement in interphase cells (the  
382 “go-with-the-flow” mechanism).

383         Previously, we have demonstrated that conventional kinesin, kinesin-1, a major  
384 microtubule plus-end motor, can slide microtubules against each other<sup>27,28,61-63</sup>, and this  
385 microtubule sliding drives ooplasmic streaming, bulk circulation of the entire cytoplasm  
386 in late-stage oocytes that is essential for localization of the posterior determinant,  
387 *osk*/Staufen RNPs<sup>29,52</sup>. Thus, both major microtubule motors, plus-end directed kinesin-

388 1 and minus-end directed dynein, in addition to canonical cargo transport along  
389 microtubules, can drive bulk transport of viscous cytoplasm. Yet kinesin-1 and dynein  
390 drive bulk movement in different manners: kinesin-1 drives microtubule sliding against  
391 each other, while dynein glides microtubules along the cortex; and for different  
392 purposes: kinesin-1 powers intracellular circulation, whereas dynein propels intercellular  
393 transport.

394 This “go-with-the-flow” mechanism is highly efficient for cargo delivery, especially  
395 in large cells, such as the oocyte. The dynein-driven cytoplasmic flow allows the oocyte  
396 to acquire cytoplasmic materials for its rapid growth. Interestingly, the ring canals, have  
397 been observed in female germline cells of vertebrate organisms (e.g., human, rabbit,  
398 rat, hamster, mouse, chicken, and frog)<sup>64</sup>. Particularly, it has been shown that  
399 cytoplasmic contents such as mitochondria and Golgi material are transferred to the  
400 mouse oocyte from interconnected cyst cells in a microtubule-dependent fashion<sup>65</sup> (Niu  
401 W. and Spradling AC. 2021. Mouse oocytes develop in cysts with the help of nurse  
402 cells. bioRxiv. doi: <https://doi.org/10.1101/2021.11.04.467284>). As dynein is highly  
403 conserved across species, it is important to have further studies to examine whether it  
404 plays a similar role in germline cytoplasmic transfer in higher organisms.

## 405 **Materials and Methods**

406 ***Drosophila* strains.** Fly stocks and crosses were maintained on standard cornmeal  
407 food (Nutri-Fly® Bloomington Formulation, Genesee, Cat #: 66-121) supplemented with  
408 dry active yeast at room temperature (~24– 25°C). The following fly stocks were used in  
409 this study: *mat atub-Gal4<sup>IV37</sup>* (III, Bloomington *Drosophila* Stock Center #7063); *Act5C-*  
410 *Gal4* (III, Bloomington *Drosophila* Stock Center #3954); *nos-Gal4-VP16* (III, from Dr.  
411 Edwin Ferguson, the University of Chicago <sup>66,67</sup>); *UAS-Dhc64C-RNAi* (line #1:  
412 TRiP.GL00543, attP40, II, Bloomington *Drosophila* Stock Center #36583, targeting  
413 DHC64C CDS 10044–10064 nt, 5'-TCGAGAGAAGATGAAGTCCAA-3'; line #2:  
414 TRiP.HMS01587, attP2, III, Bloomington *Drosophila* Stock Center #36698, targeting  
415 DHC64C CDS 1302–1322 nt, 5'-CCGAGACATTGTGAAGAAGAA-3') <sup>28,68</sup>; *UASp-GI<sup>ΔC</sup>*  
416 (1-826 residues of DCTN1/p150<sup>Glued</sup>, based on the *DCTN1/p150<sup>1</sup>* mutation) (II, 16.1,  
417 from Dr. Thomas Hays, University of Minnesota) <sup>12</sup>; *UAS-Lis1-RNAi* (II, from Dr.  
418 Graydon Gonsalvez, Augusta University, targeting Lis1 CDS 1197-1217 nt, 5'-  
419 TAGCGTAGATCAAACAGTAAA-3') <sup>19</sup>; *UAS-BicD-RNAi* (TRiP.GL00325, attP2, III,  
420 Bloomington *Drosophila* Stock Center #35405, targeting BicD 3'UTR 639-659 nt, 5'-  
421 ACGATTCAGATAGATGATGAA-3'); *UAS-Spindly-RNAi* (TRiP.HMS01283, attP2, III,  
422 Bloomington *Drosophila* Stock Center #34933, targeting Spindly CDS 1615–1635 nt, 5'-  
423 CAGGACGCGGTTGATATCAAA-3') <sup>56</sup>; *UAS-hook-RNAi* (TRiP.HMC05698, attP40, II,  
424 Bloomington *Drosophila* Stock Center #64663, targeting HOOK CDS 241-261 nt, 5'-  
425 TACGACTACTACAGCGACGTA-3'); *UAS-GFP-RNAi* (Bloomington *Drosophila* Stock  
426 Center #41551); *UASp-tdMaple3-atub84B* (II) <sup>29</sup>; *UASp-EMTB-3XTagRFP* (III) <sup>30</sup>;  
427 *UASp-GFP-Patronin* (II) (from Dr. Uri Abdu, Ben-Gurion University of the Negev) <sup>30,52,69</sup>;  
428 *Jupiter-GFP* (protein trap line ZCL2183, III) <sup>27,28,31</sup>; *UASp-LifeAct-TagRFP* (III, 68E,

429 Bloomington *Drosophila* Stock Center # 58714); *UASp-F-Tractin-tdTomato* (II,  
430 Bloomington *Drosophila* stock center #58989)<sup>43</sup>; *UAS-Zipper-RNAi* (TRiP.GL00623,  
431 attP40, II, Bloomington *Drosophila* Stock Center #37480, targeting Zipper 3'UTR 36-56  
432 nt, 5'-CAGGAAGAAGGTGATGATGAA-3'); *hs-FLP<sup>12j</sup>* (X, Bloomington *Drosophila* Stock  
433 Center #1929); *FRTG13 ubi-GFP.nls* (II, Bloomington *Drosophila* Stock Center # 5826);  
434 *FRTG13 zip<sup>2</sup>/CyO* (Bloomington *Drosophila* stock center # 8739); *sqh-GFP-RLC* (III,  
435 Bloomington *Drosophila* stock center #57145); *UASp-Mito-MoxMaple3* (II)<sup>15</sup>; *ubi-GFP-*  
436 *Pav* (II, from Dr. David Glover, Caltech)<sup>70</sup>; *UASp-RFP-Golgi* (II, Bloomington *Drosophila*  
437 Stock Center # 30908, aka *UASp-GalT-RFP*)<sup>71</sup>; *pDlic-Dlic-GFP* (II, under the control of  
438 its native promoter, from Dr. Thomas Hays, University of Minnesota) (Neisch et al.,  
439 submitted, reagent shared pre-publication). The following fly stocks were generated in  
440 this study using either PhiC31-mediated integration or P-element transformation: *UASp-*  
441 *Dlic-RNAi* (targeting Dlic 3'UTR 401-421 nt, 5'-AGAAATTTAACAAAAAAAAAAAA -3', in  
442 pWalium22 vector, inserted at attP-9A (VK00005) 75A10 site, III, M5); *UASp-GEM* (III,  
443 M1); *UASp-F-Tractin-Myc-BicD* (II, M4); *UASp-F-Tractin-GFP-Kin14V1b* (II, M1); *UASp-*  
444 *Myc-HA-DlicNT-LOV2 (M2) at attP14 (36A10)*; *UASp-Zdk1-DlicCT-sfGFP-Myc (M2) at*  
445 *attP33 (50B6)*.

#### 446 **Plasmid constructs.**

447 *pWalium22-Dlic3'UTR-shRNA*. The oligos of Dlic3'UTR-shRNA  
448 (agtAGAAATTTAACAAAAAAAAAAAAtagttatattcaagcataTTTTTTTTTTTGTAAATTTCTgc)  
449 were synthesized and inserted into the pWalium22 vector (*Drosophila* Genomics  
450 Resource Center, Stock Number #1473, 10XUAS)<sup>72</sup> by NheI(5')/EcoRI(3').

451 *pUASp-GEM*. pCDNA3.1-pCMV-PfV-GS-Sapphire was a gift from Liam Holt (Addgene  
452 plasmid # 116933; RRID:Addgene\_116933)<sup>42</sup>. GEM (PfV-GS-Sapphire) was cut and  
453 inserted into the pUASp vector by NheI(5')/XbaI(3').

454 *pUASp-F-Tractin-Myc-BicD*. F-Tractin (the actin binding domain of rat Inositol  
455 trisphosphate 3-kinase A (ITPKA), residues 9-40,  
456 atGGGCATGGCGCGACCACGGGGCGCGGGGCCCTGCAGCCCCGGGTTGGAGCGG  
457 GCTCCGCGCCGGAGCGTCGGGGAGCTGCGCCTGCTCTTCGAA)<sup>43,73</sup> was  
458 synthesized and inserted into pUASp by KpnI (5')/SpeI (3'). Myc-BicD was amplified  
459 from pAC-FRB-GFP-BicD<sup>68</sup> and inserted into pUASp vector by SpeI (5')/XbaI (3').

460 *pUASp-F-Tractin-GFP-Kin14Vlb*. F-Tractin (the actin binding domain of rat Inositol  
461 trisphosphate 3-kinase A (ITPKA), residues 9-40,  
462 atGGGCATGGCGCGACCACGGGGCGCGGGGCCCTGCAGCCCCGGGTTGGAGCGG  
463 GCTCCGCGCCGGAGCGTCGGGGAGCTGCGCCTGCTCTTCGAA)<sup>43,73</sup> was  
464 synthesized and inserted into pUASp by KpnI (5')/SpeI (3'). EGFP and Kin14Vlb were  
465 amplified from the vector of pET15b-EGFP-GCN4-kinesin14Vlb (a gift from Dr. Gohta  
466 Goshima)<sup>44</sup> by PCR and inserted into pUASp by SpeI(5')/NotI(3') and NotI(5')/XbaI (3'),  
467 respectively.

468 *pUASp-Myc-HA-DlicNT-LOV2-attB*. DlicNT (1-370 residues) and LOV2[WT] were  
469 amplified by PCR from pAC-Dlic-EGFP (a gift from Dr. Thomas Hays, University of  
470 Minnesota)<sup>74</sup> and pTriEx-NTOM20-mVenus-LOV2[WT] (a gift from Dr. Klaus Hahn,  
471 University of North Carolina at Chapel Hill)<sup>48</sup> and inserted into pMT.A vector by  
472 EcoRV(5')/XhoI(3') and XhoI(5')/XbaI(3'), respectively. Myc-HA with linkers (GGSG)  
473 was synthesized and inserted into the pMT-A-DlicNT-LOV2[WT] by

474 EcoRI(5')/EcoRV(3'). Myc-HA-DlicNT-LOV2[WT] was subcloned from the pMT.A-Myc-  
475 HA-DlicNT-LOV2[WT] into the pUASp vector by KpnI(5')/XbaI(3'), and attB site was  
476 subcloned from the pUASp-attB vector (*Drosophila* Genomics Resource Center/DGRC  
477 vector #1358) by AatII(5')/AatII(3') to create pUASp-Myc-HA-DlicNT-LOV2-attB.

478 pUASp-Zdk1-DlicCT-sfGFP-Myc-attB. Zdk1 and C-terminus of Dlic (371-493 residues)  
479 were amplified by PCR from pTriEx-mCherry-Zdk1 (a gift from Dr. Klaus Hahn,  
480 University of North Carolina at Chapel Hill)<sup>48</sup> and pAC-Dlic-EGFP (a gift from Dr.  
481 Thomas Hays, University of Minnesota)<sup>74</sup>, and inserted into pMT.A by  
482 SpeI(5')/EcoRI(3') and EcoRI(5')/EcoRV(3'), respectively. Superfolder GFP (sfGFP) with  
483 a Myc tag was inserted into the pMT.A-Zdk1-DlicCT by EcoRV(5')/XbaI(3'). Zdk1-  
484 DlicCT-sfGFP-myc was then subcloned into the pUASp-attB vector (*Drosophila*  
485 Genomics Resource Center/DGRC vector #1358) by SpeI(5')/XbaI(3') to create pUASp-  
486 Zdk1-DlicCT-sfGFP-Myc-attB.

487 pcDNA3.1(+)-Myc-HA-DlicNT-LOV2. Myc-HA-DlicNT-LOV2 was subcloned from pMT.A-  
488 Myc-HA-DlicNT-LOV2[WT] into pcDNA3.1(+) by KpnI(5')/XbaI(3').

489 pcDNA3.1(+)-Zdk1-DLicCT-sfGFP-Myc. Zdk1-DlicCT-sfGFP-Myc was amplified by PCR  
490 from pMT.A-Zdk1-DlicCT-sfGFP-Myc and inserted into pcDNA3.1(+) by  
491 HindIII(5')/XbaI(3').

492 **Immunostaining of *Drosophila* egg chambers.** A standard fixation and staining  
493 protocol was previously described<sup>15,29,30,52,67</sup>. Samples were stained with primary  
494 antibody at 4°C overnight and with fluorophore-conjugated secondary antibody at room  
495 temperature (24~25°C) for 4 h. Primary antibody used in this study: mouse monoclonal

496 anti-Orb antibody (Orb 4H8, Developmental Studies Hybridoma Bank, supernatant, 1:5);  
497 rabbit phospho-MLC (pMLC 2/Ser19, 1:100, Cell Signaling, Cat# 3671); mouse  
498 monoclonal anti-DHC antibody (2C11-2, Developmental Studies Hybridoma Bank,  
499 concentrate, 1:50); mouse monoclonal anti-Myc antibody (1-9E10.2, 1:100)<sup>75</sup>.

500 Secondary antibody used in this study: FITC-conjugated or TRITC-conjugated anti-  
501 mouse secondary antibody (Jackson ImmunoResearch Laboratories, Inc; Cat# 115-  
502 095-062 and Cat# 115-025-003) at 10 µg/ml; FITC-conjugated anti-rabbit secondary  
503 antibody (Jackson ImmunoResearch Laboratories, Inc; Cat#111-095-003) at 10 µg/ml.

504 Some samples were stained with rhodamine-conjugated phalloidin (0.2 µg/ml) and DAPI  
505 (1 µg/mL) for 1 ~2 h before mounting. Samples were imaged on a Nikon A1plus  
506 scanning confocal microscope with a GaAsP detector and a 20× 0.75 N.A. lens using  
507 Galvano scanning, a Nikon W1 spinning disk confocal microscope (Yokogawa CSU with  
508 pinhole size 50 µm) with Photometrics Prime 95B sCMOS Camera or Hamamatsu  
509 ORCA-Fusion Digital CMOS Camera and a 40 x 1.30 N.A. oil lens or a 40X 1.25 N.A.  
510 silicone oil lens, or a Nikon Eclipse U2000 inverted stand with a Yokogawa CSU10  
511 spinning disk confocal head with an Photometrics Evolve EMCCD camera and a 40×  
512 1.30 N.A. oil lens, all controlled by Nikon Elements software. Z-stack.images were  
513 acquired every 1 µm/step for whole ovariole imaging or 0.3~0.5 µm/step for individual  
514 egg chambers.

515 **Microtubule staining in *Drosophila* egg chambers.** Ovaries were dissected in  
516 1XPBS and fixed in 8% EM-grade formaldehyde +1X Brinkley Renaturing Buffer 80  
517 (BRB80, 80 mM piperazine-N,N'-bis(2-ethanesulfonic acid) [PIPES]), 1 mM MgCl<sub>2</sub>, 1  
518 mM EGTA, pH 6.8) +0.1%Triton X-100 for 20 min on the rotator; briefly washed with



519 1XPBTB (1XPBS+0.1% Triton X-100+0.2% BSA) five times and stained with FITC-  
520 conjugated  $\beta$ -tubulin antibody (ProteinTech, Cat# CL488-66240) 1:100 at 4C overnight;  
521 then samples were stained rhodamine-conjugated phalloidin and DAPI for 1 h before  
522 mounting. Samples were imaged using Nikon W1 spinning disk confocal microscope  
523 (Yokogawa CSU with pinhole size 50  $\mu$ m) with Photometrics Prime 95B sCMOS  
524 Camera, and a 40X 1.25 N.A. silicone oil lens, controlled by Nikon Elements software.  
525 Images were acquired every 0.3  $\mu$ m/step in z stacks and 3D deconvolved using  
526 Richardson-Lucy iterative algorithm provided by Nikon Elements.

527 **Live imaging of *Drosophila* egg chamber.** Young mated female adults were fed with  
528 dry active yeast for 16~18 hours and then dissected in Halocarbon oil 700 (Sigma-  
529 Aldrich, Cat# H8898) as previously described<sup>15,29,30,52</sup>. Fluorescent samples were  
530 imaged using Nikon W1 spinning disk confocal microscope (Yokogawa CSU with  
531 pinhole size 50  $\mu$ m) with Photometrics Prime 95B sCMOS Camera or Hamamatsu  
532 ORCA-Fusion Digital CMOS Camera, and a 40 x 1.30 N.A. oil lens or a 40X 1.25 N.A.  
533 silicone oil lens, controlled by Nikon Elements software.

534 **Photoconversion of tdMaple3-tubulin and Mito-MoxMaple3 in ovary.**

535 Photoconversions of tdMaple3-tubulin and Mito-MoxMaple3 were performed using  
536 illumination from a Heliophor 89 North light in the epifluorescence pathway by a 405 nm  
537 filter, either locally (for tdMaple3-tubulin) or globally (for Mito-MoxMaple3) through an  
538 adjustable pinhole in the field diaphragm position for 10~20 s. Samples were imaged  
539 either on a Nikon Eclipse U2000 inverted stand with a Yokogawa CSU10 spinning disk  
540 confocal head with an Photometrics Evolve EMCCD camera and a 40 $\times$  1.30 N.A. oil  
541 lens (for tdMaple3-tubulin), or a Nikon W1 spinning disk confocal microscope

542 (Yokogawa CSU with pinhole size 50  $\mu\text{m}$ ) with Hamamatsu ORCA-Fusion Digital CMOS  
543 Camera and a 40X 1.25 N.A. silicone oil lens (Mito-MoxMaple3), all controlled by Nikon  
544 Elements software.

545 **Induction of *zip*<sup>2</sup> germline clones.** *FRTG13 zip*<sup>2</sup>/*CyO* virgin female flies were crossed  
546 with males carrying *hs-flp*<sup>[12]/y</sup>; *FRTG13 ubi-GFP.nls/CyO*. From the cross, young pupae  
547 at day 7 and day 8 AEL (after egg laying) were subjected to heat shock at 37 °C for 2  
548 hours each day. Non *CyO* F1 females were collected 3-4 day after heat shock and  
549 fattened with dry active yeast overnight before dissection for fixation and Orb staining.

550 **Extraction and fixation of ovary samples.** Ovaries were dissected and gently teased  
551 apart in 1X Brinkley Renaturing Buffer 80 (BRB80, 80 mM piperazine-N,N'-bis(2-  
552 ethanesulfonic acid) [PIPES]), 1 mM MgCl<sub>2</sub>, 1 mM EGTA, pH 6.8). The dissected  
553 samples were extracted in 1X BRB80+1% Triton X-100 for 20 min without agitation.  
554 After the extraction, the samples were fixed with EM-grade formaldehyde in 1X  
555 BRB80+0.1% Triton X-100 for 20min on rotator, washed with 1XPBTB (1XPBS+0.1%  
556 Triton X-100+0.2% BSA) five times before immunostaining.

557 **Measurement of nurse cell size.** Z stacks of triple color images of the ovarioles from  
558 *yw*; *ubi-GFP-Pav* stained with rhodamine conjugated-phalloidin and DAPI were  
559 acquired, and nurse cell area was specified (at the largest cross-section) and measured  
560 by manual polygon selection (area size) in FIJI <sup>76</sup>.

561 **S2R+ cell transfection and imaging acquisition.** *Drosophila* S2R+ cells were  
562 transfected with 0.5  $\mu\text{g}$  DNA (pAC-Gal4+pUASp-GEM, or pAC-LAMP1-GFP <sup>77</sup>) in 12-  
563 well plate using Effecetene transfection kit (Qiagen, Cat. # / ID: 301425) and then were

564 plated 48 hours after transfection on concanavalin A-coated glass coverslips<sup>78</sup>. Cells  
565 were imaged using Nikon W1 spinning disk confocal microscope (Yokogawa CSU with  
566 pinhole size 50  $\mu\text{m}$ ) with Photometrics Prime 95B sCMOS Camera, and a 100 x 1.45  
567 N.A. oil lens, controlled by Nikon Elements software.

568 **Measurement of GEM particle movement in control and *dynein-RNAi*.** Samples  
569 expressing GEM particles (*yw; mat atub-Gal4<sup>[V37]</sup>/UASp-GEM* and *yw; UAS-Dhc64C-*  
570 *RNAi/+; mat atub-Gal4<sup>[V37]</sup>/UASp-GEM*) were imaged on a Nikon W1 spinning disk  
571 confocal microscope (Yokogawa CSU with pinhole size 50  $\mu\text{m}$ ) with Photometrics Prime  
572 95B sCMOS Camera and a 40X 1.25 N.A. silicone oil lens for 2 min at the frame rate of  
573 every 2 sec, controlled by Nikon Elements software. Images were processed in Fiji and  
574 analyzed DiaTrack 3.04 Pro<sup>79</sup>, with a maximum particle jump distance of 3.2  $\mu\text{m/s}$ .

575 **HEK293 cell transfection and GFP-binder pull-down assay.** HEK293 cells were co-  
576 transfected with pcDNA3.1(+)-myc-HA-DlicNT-LOV2 and pcDNA3.1(+)-Zdk1-DlicCT-  
577 sfGFP-Myc by Calcium Phosphate transfection as previously described<sup>80</sup>. 40~48 hrs  
578 later cell extracts from transfected cells were made with red-only light on (no blue light,  
579 considered as “dark”): cells were rinsed twice with 1XPBS and scraped into 350  $\mu\text{l}$   
580 extraction buffer (10mM Tris-buffer, pH7.4, 50mM NaCl; 0.5 mM MgCl<sub>2</sub>); cracked in cell  
581 cracker and collected in 1.5 ml microtube. Triton X-100 was added to the extract to final  
582 concentration of 1%. The extract was centrifuged at 14k for 15 min at 4°C (Eppendorf,  
583 5804R). Supernatant was collected and divided equally in two parts. Both samples were  
584 mixed with 25  $\mu\text{l}$  pre-washed GFP-binder agarose beads (Chromotek)<sup>81</sup>. One sample  
585 was kept in aluminum foil for 2 hours at 4C (dark); another sample was illuminated first  
586 with blue light for 1 min and then full natural light for 2 hours at 4°C. Beads were

587 washed twice, and eluted with 40-50  $\mu$ l 5x sample buffer. Initial cell extract and both  
588 eluted samples were separated by electrophoresis in 8% SDS-PAGE gel, and  
589 transferred to nitrocellulose membrane (Odyssey Nitrocellulose Membrane, LI-COR).  
590 Membrane was blotted with mouse monoclonal anti-Myc antibody (1-9E10.2, 1:1000),  
591 followed by HRP-conjugated goat-anti-mouse secondary antibody (Jackson  
592 ImmunoResearch Laboratories, Cat# 115-035-003, 1:10,000). The blot was developed  
593 on Odyssey phosphoimager (LI-COR).

594 **Statistical analysis.** The plots in figures show either percentage of phenotypes, or  
595 average values, as indicated in figure legends. Error bars represent 95% confidence  
596 intervals. N stands for number of samples examined in each assay, unless it is specified  
597 elsewhere in figure legends. Unpaired t tests with Welch's correction were performed in  
598 GraphPad Prism 8.0.2. P values and levels of significance are listed in figure legends.

## 599 **Acknowledgements**

600 We would like to thank many colleagues who generously contributed reagents for  
601 this work: Dr. Thomas Hays (University of Minnesota); Dr. Graydon Gonsalvez (Augusta  
602 University); Dr. Uri Abdu (Ben-Gurion University of the Negev, Israel); Dr. David Glover  
603 (Caltech); Dr. Gohta Goshima (Nagoya University, Japan); Dr. Klaus Hahn (University  
604 of North Carolina Chapel Hill); Dr. Andrew Carter (MRC Laboratory of Molecular  
605 Biology, Cambridge); Dr. Edwin Ferguson (the University of Chicago); Bloomington  
606 *Drosophila* Stock Center (supported by National Institutes of Health grant  
607 P40OD018537) and *Drosophila* Genomics Resource Center (supported by NIH grant  
608 2P40OD010949). The Orb 4H8 monoclonal antibody developed by Dr. Paul D. Schedl's  
609 group at Princeton University and DHC 2C11-2 antibody developed by Dr. Jonathan M.  
610 Scholey's group at University of California, Davis, were obtained from the  
611 Developmental Studies Hybridoma Bank, created by the NICHD of the NIH and  
612 maintained at The University of Iowa, Department of Biology, Iowa City, IA 52242. We  
613 also thank all the Gelfand laboratory members for support, discussions, and  
614 suggestions.

615 Research reported in this study was supported by the National Institute of  
616 General Medical Sciences grants R01GM124029 and R35GM131752 to V.I. Gelfand.

## 617 **Author contributions**

618 W.L. and V.I.G. planned and designed the research. W.L., M.L., A.S.S. and  
619 V.I.G. conducted experiments and data analysis; W.L. and V.I.G. wrote the manuscript.

## 620 **Declaration of interests**

621           The authors declare no competing financial interests.

622    **Data Availability and Code Availability statement**

623    All data generated and analyzed during this study are included in this manuscript. This

624    study didn't generate computational code.

## 625 **References:**

- 626 1 Roberts, A. J., Kon, T., Knight, P. J., Sutoh, K. & Burgess, S. A. Functions and mechanics of dynein  
627 motor proteins. *Nat Rev Mol Cell Bio* **14**, 713-726, doi:10.1038/nrm3667 (2013).
- 628 2 Reck-Peterson, S. L., Redwine, W. B., Vale, R. D. & Carter, A. P. The cytoplasmic dynein transport  
629 machinery and its many cargoes. *Nature reviews. Molecular cell biology* **19**, 382-398,  
630 doi:10.1038/s41580-018-0004-3 (2018).
- 631 3 Vaughan, K. T. Roles of Cytoplasmic Dynein During Mitosis. *Dyneins: Structure, Biology and*  
632 *Disease*, 523-535, doi:10.1016/B978-0-12-382004-4.10020-2 (2012).
- 633 4 Karki, S. & Holzbaur, E. L. Cytoplasmic dynein and dynactin in cell division and intracellular  
634 transport. *Current opinion in cell biology* **11**, 45-53, doi:10.1016/s0955-0674(99)80006-4 (1999).
- 635 5 Canty, J. T. & Yildiz, A. Activation and Regulation of Cytoplasmic Dynein. *Trends Biochem Sci* **45**,  
636 440-453, doi:10.1016/j.tibs.2020.02.002 (2020).
- 637 6 Cianfrocco, M. A., DeSantis, M. E., Leschziner, A. E. & Reck-Peterson, S. L. Mechanism and  
638 regulation of cytoplasmic dynein. *Annual review of cell and developmental biology* **31**, 83-108,  
639 doi:10.1146/annurev-cellbio-100814-125438 (2015).
- 640 7 Urnavicius, L. *et al.* The structure of the dynactin complex and its interaction with dynein.  
641 *Science* **347**, 1441-1446, doi:10.1126/science.aaa4080 (2015).
- 642 8 McKenney, R. J., Vershinin, M., Kunwar, A., Vallee, R. B. & Gross, S. P. LIS1 and NudE induce a  
643 persistent dynein force-producing state. *Cell* **141**, 304-314, doi:10.1016/j.cell.2010.02.035  
644 (2010).
- 645 9 Olenick, M. A. & Holzbaur, E. L. F. Dynein activators and adaptors at a glance. *Journal of cell*  
646 *science* **132**, doi:10.1242/jcs.227132 (2019).
- 647 10 McGrail, M. & Hays, T. S. The microtubule motor cytoplasmic dynein is required for spindle  
648 orientation during germline cell divisions and oocyte differentiation in *Drosophila*. *Development*  
649 **124**, 2409-2419 (1997).
- 650 11 Liu, Z., Xie, T. & Steward, R. Lis1, the *Drosophila* homolog of a human lissencephaly disease  
651 gene, is required for germline cell division and oocyte differentiation. *Development* **126**, 4477-  
652 4488 (1999).
- 653 12 Mische, S., Li, M. G., Serr, M. & Hays, T. S. Direct observation of regulated ribonucleoprotein  
654 transport across the nurse cell/oocyte boundary. *Molecular biology of the cell* **18**, 2254-2263,  
655 doi:10.1091/mbc.E06-10-0959 (2007).
- 656 13 Clark, A., Meignin, C. & Davis, I. A Dynein-dependent shortcut rapidly delivers axis determination  
657 transcripts into the *Drosophila* oocyte. *Development* **134**, 1955-1965, doi:10.1242/dev.02832  
658 (2007).
- 659 14 Nicolas, E., Chenouard, N., Olivo-Marin, J. C. & Guichet, A. A dual role for actin and microtubule  
660 cytoskeleton in the transport of Golgi units from the nurse cells to the oocyte across ring canals.  
661 *Molecular biology of the cell* **20**, 556-568, doi:10.1091/mbc.E08-04-0360 (2009).
- 662 15 Lu, W., Lakonishok, M. & Gelfand, V. I. Gatekeeper function for Short stop at the ring canals of  
663 the *Drosophila* ovary. *Current biology : CB*, doi:10.1016/j.cub.2021.05.010 (2021).
- 664 16 Januschke, J. *et al.* Polar transport in the *Drosophila* oocyte requires Dynein and Kinesin I  
665 cooperation. *Current biology : CB* **12**, 1971-1981 (2002).
- 666 17 Duncan, J. E. & Warrior, R. The cytoplasmic dynein and kinesin motors have interdependent  
667 roles in patterning the *Drosophila* oocyte. *Current biology : CB* **12**, 1982-1991,  
668 doi:10.1016/s0960-9822(02)01303-9 (2002).
- 669 18 Trovisco, V. *et al.* bicoid mRNA localises to the *Drosophila* oocyte anterior by random Dynein-  
670 mediated transport and anchoring. *eLife* **5**, doi:10.7554/eLife.17537 (2016).

- 671 19 Liu, G. *et al.* Efficient Endocytic Uptake and Maturation in *Drosophila* Oocytes Requires  
672 Dynamitin/p50. *Genetics* **201**, 631-649, doi:10.1534/genetics.115.180018 (2015).
- 673 20 Bastock, R. & St Johnston, D. *Drosophila* oogenesis. *Current biology : CB* **18**, R1082-1087,  
674 doi:10.1016/j.cub.2008.09.011 (2008).
- 675 21 Mahajan-Miklos, S. & Cooley, L. Intercellular cytoplasm transport during *Drosophila* oogenesis.  
676 *Developmental biology* **165**, 336-351, doi:10.1006/dbio.1994.1257 (1994).
- 677 22 Sanghavi, P., Liu, G., Veeranan-Karmegam, R., Navarro, C. & Gonsalvez, G. B. Multiple Roles for  
678 Egalitarian in Polarization of the *Drosophila* Egg Chamber. *Genetics* **203**, 415-432,  
679 doi:10.1534/genetics.115.184622 (2016).
- 680 23 Lantz, V., Chang, J. S., Horabin, J. I., Bopp, D. & Schedl, P. The *Drosophila* Orb Rna-Binding  
681 Protein Is Required for the Formation of the Egg Chamber and Establishment of Polarity. *Genes  
682 & development* **8**, 598-613, doi:DOI 10.1101/gad.8.5.598 (1994).
- 683 24 Lee, I. G. *et al.* A conserved interaction of the dynein light intermediate chain with dynein-  
684 dynactin effectors necessary for processivity. *Nature communications* **9**, 986,  
685 doi:10.1038/s41467-018-03412-8 (2018).
- 686 25 Clemente, G. D. *et al.* Requirement of the Dynein-Adaptor Spindly for Mitotic and Post-Mitotic  
687 Functions in *Drosophila*. *J Dev Biol* **6**, doi:10.3390/jdb6020009 (2018).
- 688 26 Kramer, H. & Pistry, M. Genetic analysis of hook, a gene required for endocytic trafficking in  
689 *drosophila*. *Genetics* **151**, 675-684 (1999).
- 690 27 Lu, W., Fox, P., Lakonishok, M., Davidson, M. W. & Gelfand, V. I. Initial Neurite Outgrowth in  
691 *Drosophila* Neurons Is Driven by Kinesin-Powered Microtubule Sliding. *Current biology : CB* **23**,  
692 1018-1023, doi:10.1016/j.cub.2013.04.050 (2013).
- 693 28 Lu, W., Lakonishok, M. & Gelfand, V. I. Kinesin-1-powered microtubule sliding initiates axonal  
694 regeneration in *Drosophila* cultured neurons. *Molecular biology of the cell* **26**, 1296-1307,  
695 doi:10.1091/mbc.E14-10-1423 (2015).
- 696 29 Lu, W., Winding, M., Lakonishok, M., Wildonger, J. & Gelfand, V. I. Microtubule-microtubule  
697 sliding by kinesin-1 is essential for normal cytoplasmic streaming in *Drosophila* oocytes.  
698 *Proceedings of the National Academy of Sciences of the United States of America* **113**, E4995-  
699 5004, doi:10.1073/pnas.1522424113 (2016).
- 700 30 Lu, W. *et al.* Competition between kinesin-1 and myosin-V defines *Drosophila* posterior  
701 determination. *eLife* **9**, doi:10.7554/eLife.54216 (2020).
- 702 31 Karpova, N., Bobiniec, Y., Fouix, S., Huitorel, P. & Debec, A. Jupiter, a new *Drosophila* protein  
703 associated with microtubules. *Cell motility and the cytoskeleton* **63**, 301-312,  
704 doi:10.1002/cm.20124 (2006).
- 705 32 Buszczak, M. & Cooley, L. Eggs to die for: cell death during *Drosophila* oogenesis. *Cell Death  
706 Differ* **7**, 1071-1074, doi:10.1038/sj.cdd.4400755 (2000).
- 707 33 Gutzeit, H. O. The role of microfilaments in cytoplasmic streaming in *Drosophila* follicles. *Journal  
708 of cell science* **80**, 159-169 (1986).
- 709 34 Wheatley, S., Kulkarni, S. & Karess, R. *Drosophila* nonmuscle myosin II is required for rapid  
710 cytoplasmic transport during oogenesis and for axial nuclear migration in early embryos.  
711 *Development* **121**, 1937-1946 (1995).
- 712 35 Jordan, P. & Karess, R. Myosin light chain-activating phosphorylation sites are required for  
713 oogenesis in *Drosophila*. *The Journal of cell biology* **139**, 1805-1819, doi:10.1083/jcb.139.7.1805  
714 (1997).
- 715 36 Sun, Y., Yan, Y., Denef, N. & Schupbach, T. Regulation of somatic myosin activity by protein  
716 phosphatase 1beta controls *Drosophila* oocyte polarization. *Development* **138**, 1991-2001,  
717 doi:10.1242/dev.062190 (2011).



- 718 37 Halsell, S. R., Chu, B. I. & Kiehart, D. P. Genetic analysis demonstrates a direct link between rho  
719 signaling and nonmuscle myosin function during *Drosophila* morphogenesis. *Genetics* **155**, 1253-  
720 1265 (2000).
- 721 38 Cooley, L., Verheyen, E. & Ayers, K. chickadee encodes a profilin required for intercellular  
722 cytoplasm transport during *Drosophila* oogenesis. *Cell* **69**, 173-184 (1992).
- 723 39 Myster, D. L., Bonnette, P. C. & Duronio, R. J. A role for the DP subunit of the E2F transcription  
724 factor in axis determination during *Drosophila* oogenesis. *Development* **127**, 3249-3261 (2000).
- 725 40 Imran Alsous, J. *et al.* Dynamics of hydraulic and contractile wave-mediated fluid transport  
726 during *Drosophila* oogenesis. *Proceedings of the National Academy of Sciences of the United*  
727 *States of America* **118**, doi:10.1073/pnas.2019749118 (2021).
- 728 41 Lu, W. & Gelfand, V. I. Moonlighting Motors: Kinesin, Dynein, and Cell Polarity. *Trends in cell*  
729 *biology*, doi:10.1016/j.tcb.2017.02.005 (2017).
- 730 42 Delarue, M. *et al.* mTORC1 Controls Phase Separation and the Biophysical Properties of the  
731 Cytoplasm by Tuning Crowding. *Cell* **174**, 338-349 e320, doi:10.1016/j.cell.2018.05.042 (2018).
- 732 43 Spracklen, A. J., Fagan, T. N., Lovander, K. E. & Tootle, T. L. The pros and cons of common actin  
733 labeling tools for visualizing actin dynamics during *Drosophila* oogenesis. *Developmental biology*  
734 **393**, 209-226, doi:10.1016/j.ydbio.2014.06.022 (2014).
- 735 44 Jonsson, E., Yamada, M., Vale, R. D. & Goshima, G. Clustering of a kinesin-14 motor enables  
736 processive retrograde microtubule-based transport in plants. *Nat Plants* **1**,  
737 doi:10.1038/NPLANTS.2015.87 (2015).
- 738 45 Nijenhuis, W., van Grinsven, M. M. P. & Kapitein, L. C. An optimized toolbox for the optogenetic  
739 control of intracellular transport. *The Journal of cell biology* **219**, doi:10.1083/jcb.201907149  
740 (2020).
- 741 46 Yamada, M., Tanaka-Takiguchi, Y., Hayashi, M., Nishina, M. & Goshima, G. Multiple kinesin-14  
742 family members drive microtubule minus end-directed transport in plant cells. *The Journal of*  
743 *cell biology* **216**, 1705-1714, doi:10.1083/jcb.201610065 (2017).
- 744 47 Schroeder, C. M., Ostrem, J. M., Hertz, N. T. & Vale, R. D. A Ras-like domain in the light  
745 intermediate chain bridges the dynein motor to a cargo-binding region. *eLife* **3**, e03351,  
746 doi:10.7554/eLife.03351 (2014).
- 747 48 Wang, H. *et al.* LOVTRAP: an optogenetic system for photoinduced protein dissociation. *Nature*  
748 *methods* **13**, 755-758, doi:10.1038/nmeth.3926 (2016).
- 749 49 Moore, J. K., Li, J. & Cooper, J. A. Dynactin function in mitotic spindle positioning. *Traffic* **9**, 510-  
750 527, doi:10.1111/j.1600-0854.2008.00710.x (2008).
- 751 50 Okumura, M., Natsume, T., Kanemaki, M. T. & Kiyomitsu, T. Dynein-Dynactin-NuMA clusters  
752 generate cortical spindle-pulling forces as a multi-arm ensemble. *eLife* **7**,  
753 doi:10.7554/eLife.36559 (2018).
- 754 51 Swan, A., Nguyen, T. & Suter, B. *Drosophila* Lissencephaly-1 functions with Bic-D and dynein in  
755 oocyte determination and nuclear positioning. *Nature cell biology* **1**, 444-449,  
756 doi:10.1038/15680 (1999).
- 757 52 Lu, W. *et al.* Ooplasmic flow cooperates with transport and anchorage in *Drosophila* oocyte  
758 posterior determination. *The Journal of cell biology* **217**, 3497-3511, doi:10.1083/jcb.201709174  
759 (2018).
- 760 53 Glater, E. E., Megeath, L. J., Stowers, R. S. & Schwarz, T. L. Axonal transport of mitochondria  
761 requires milton to recruit kinesin heavy chain and is light chain independent. *The Journal of cell*  
762 *biology* **173**, 545-557, doi:10.1083/jcb.200601067 (2006).
- 763 54 Liu, R. *et al.* Sisyphus, the *Drosophila* myosin XV homolog, traffics within filopodia transporting  
764 key sensory and adhesion cargos. *Development* **135**, 53-63, doi:10.1242/dev.011437 (2008).

- 765 55 Gutzeit, H. O. & Koppa, R. Time-Lapse Film Analysis of Cytoplasmic Streaming during Late  
766 Oogenesis of *Drosophila*. *Journal of embryology and experimental morphology* **67**, 101-111  
767 (1982).
- 768 56 Del Castillo, U., Muller, H. J. & Gelfand, V. I. Kinetochore protein Spindly controls microtubule  
769 polarity in *Drosophila* axons. *Proceedings of the National Academy of Sciences of the United*  
770 *States of America* **117**, 12155-12163, doi:10.1073/pnas.2005394117 (2020).
- 771 57 Jouette, J., Guichet, A. & Claret, S. B. Dynein-mediated transport and membrane trafficking  
772 control PAR3 polarised distribution. *eLife* **8**, doi:10.7554/eLife.40212 (2019).
- 773 58 Benton, R. & St Johnston, D. *Drosophila* PAR-1 and 14-3-3 inhibit Bazooka/PAR-3 to establish  
774 complementary cortical domains in polarized cells. *Cell* **115**, 691-704 (2003).
- 775 59 Wei, S. Y. *et al.* Echinoid is a component of adherens junctions that cooperates with DE-Cadherin  
776 to mediate cell adhesion. *Developmental cell* **8**, 493-504, doi:10.1016/j.devcel.2005.03.015  
777 (2005).
- 778 60 Harris, T. J. & Peifer, M. The positioning and segregation of apical cues during epithelial polarity  
779 establishment in *Drosophila*. *The Journal of cell biology* **170**, 813-823,  
780 doi:10.1083/jcb.200505127 (2005).
- 781 61 Jolly, A. L. *et al.* Kinesin-1 heavy chain mediates microtubule sliding to drive changes in cell  
782 shape. *Proceedings of the National Academy of Sciences of the United States of America* **107**,  
783 12151-12156, doi:10.1073/pnas.1004736107 (2010).
- 784 62 Barlan, K., Lu, W. & Gelfand, V. I. The microtubule-binding protein ensconsin is an essential  
785 cofactor of kinesin-1. *Current biology : CB* **23**, 317-322, doi:10.1016/j.cub.2013.01.008 (2013).
- 786 63 del Castillo, U., Lu, W., Winding, M., Lakonishok, M. & Gelfand, V. I. Pavarotti/MKLP1 regulates  
787 microtubule sliding and neurite outgrowth in *Drosophila* neurons. *Current biology : CB* **25**, 200-  
788 205, doi:10.1016/j.cub.2014.11.008 (2015).
- 789 64 Haglund, K., Nezis, I. P. & Stenmark, H. Structure and functions of stable intercellular bridges  
790 formed by incomplete cytokinesis during development. *Communicative & integrative biology* **4**,  
791 1-9, doi:10.4161/cib.4.1.13550 (2011).
- 792 65 Lei, L. & Spradling, A. C. Mouse oocytes differentiate through organelle enrichment from sister  
793 cyst germ cells. *Science* **352**, 95-99, doi:10.1126/science.aad2156 (2016).
- 794 66 Van Doren, M., Williamson, A. L. & Lehmann, R. Regulation of zygotic gene expression in  
795 *Drosophila* primordial germ cells. *Current biology : CB* **8**, 243-246 (1998).
- 796 67 Lu, W. *et al.* Niche-associated activation of rac promotes the asymmetric division of *Drosophila*  
797 female germline stem cells. *PLoS biology* **10**, e1001357, doi:10.1371/journal.pbio.1001357  
798 (2012).
- 799 68 Del Castillo, U., Winding, M., Lu, W. & Gelfand, V. I. Interplay between kinesin-1 and cortical  
800 dynein during axonal outgrowth and microtubule organization in *Drosophila* neurons. *eLife* **4**,  
801 doi:10.7554/eLife.10140 (2015).
- 802 69 Baskar, R., Bakrhat, A. & Abdu, U. GFP-Forked, a genetic reporter for studying *Drosophila* oocyte  
803 polarity. *Biology open* **8**, doi:10.1242/bio.039552 (2019).
- 804 70 Minestrini, G., Mathe, E. & Glover, D. M. Domains of the Pavarotti kinesin-like protein that direct  
805 its subcellular distribution: effects of mislocalisation on the tubulin and actin cytoskeleton  
806 during *Drosophila* oogenesis. *Journal of cell science* **115**, 725-736 (2002).
- 807 71 Chowdhary, S., Tomer, D., Dubal, D., Sambre, D. & Rikhy, R. Analysis of mitochondrial  
808 organization and function in the *Drosophila* blastoderm embryo. *Scientific reports* **7**, 5502,  
809 doi:10.1038/s41598-017-05679-1 (2017).
- 810 72 Ni, J. Q. *et al.* A genome-scale shRNA resource for transgenic RNAi in *Drosophila*. *Nature*  
811 *methods* **8**, 405-407, doi:10.1038/nmeth.1592 (2011).

- 812 73 Johnson, H. W. & Schell, M. J. Neuronal IP3 3-kinase is an F-actin-bundling protein: role in  
813 dendritic targeting and regulation of spine morphology. *Molecular biology of the cell* **20**, 5166-  
814 5180, doi:10.1091/mbc.E09-01-0083 (2009).
- 815 74 Mische, S. *et al.* Dynein Light Intermediate Chain: An Essential Subunit That Contributes to  
816 Spindle Checkpoint Inactivation. *Molecular biology of the cell* **19**, 4918-4929,  
817 doi:10.1091/mbc.E08-05-0483 (2008).
- 818 75 Karcher, R. L. *et al.* Cell cycle regulation of myosin-V by calcium/calmodulin-dependent protein  
819 kinase II. *Science* **293**, 1317-1320, doi:10.1126/science.1061086 (2001).
- 820 76 Schindelin, J. *et al.* Fiji: an open-source platform for biological-image analysis. *Nature methods* **9**,  
821 676-682, doi:10.1038/nmeth.2019 (2012).
- 822 77 Minin, A. A. *et al.* Regulation of mitochondria distribution by RhoA and formins. *Journal of cell*  
823 *science* **119**, 659-670, doi:10.1242/jcs.02762 (2006).
- 824 78 Lu, W., Del Castillo, U. & Gelfand, V. I. Organelle transport in cultured Drosophila cells: s2 cell  
825 line and primary neurons. *Journal of visualized experiments : JoVE*, doi:10.3791/50838 (2013).
- 826 79 Vallotton, P. & Olivier, S. Tri-track: free software for large-scale particle tracking. *Microscopy and*  
827 *microanalysis : the official journal of Microscopy Society of America, Microbeam Analysis Society,*  
828 *Microscopical Society of Canada* **19**, 451-460, doi:10.1017/S1431927612014328 (2013).
- 829 80 Kingston, R. E., Chen, C. A. & Rose, J. K. Calcium phosphate transfection. *Curr Protoc Mol Biol*  
830 **Chapter 9**, Unit 9 1, doi:10.1002/0471142727.mb0901s63 (2003).
- 831 81 Robert, A. *et al.* Kinesin-dependent transport of keratin filaments: a unified mechanism for  
832 intermediate filament transport. *FASEB journal : official publication of the Federation of*  
833 *American Societies for Experimental Biology* **33**, 388-399, doi:10.1096/fj.201800604R (2019).

834

835 **Figure and figure legends**

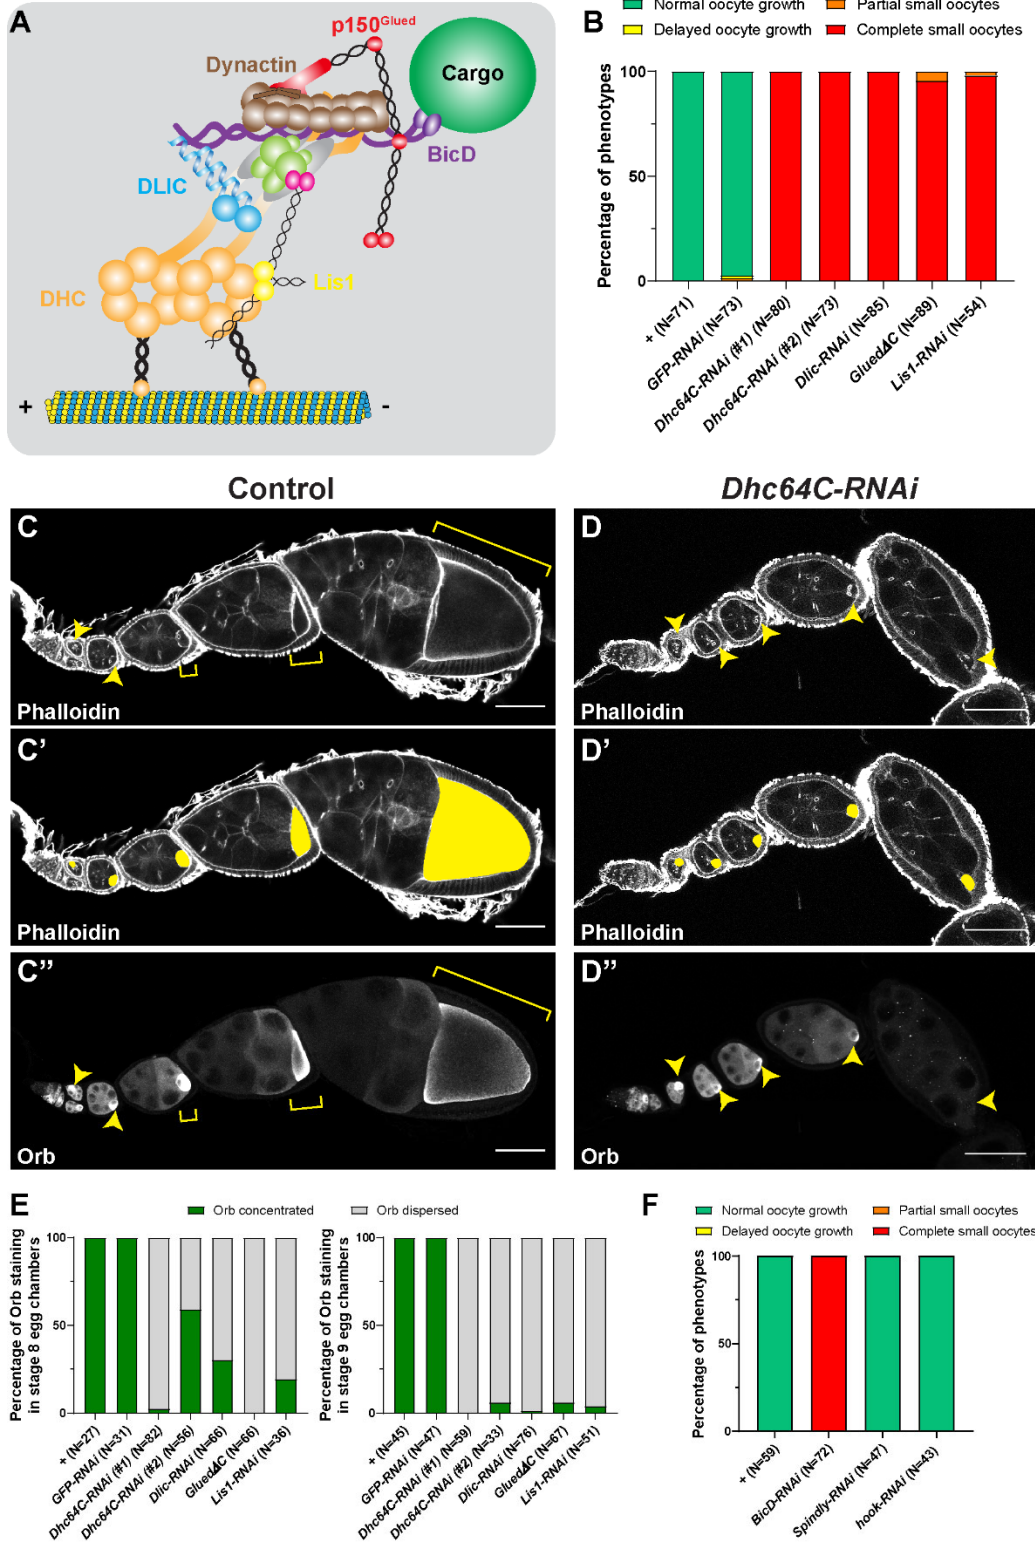

**Figure 1**

836

837 **Figure 1. Dynein activity is required for *Drosophila* oocyte growth.**

838 (A) A cartoon illustration of cytoplasmic dynein and its regulators. The dynein core  
839 complex is composed of dimers of dynein heavy chain (orange), dynein intermediate  
840 chain (gray), dynein light intermediate chain (blue), and three types of dynein light  
841 chains (green). Dynein activity is regulated by the dynactin complex (brown, with  
842 p150<sup>Glued</sup> highlighted in red) and the Lis1-NudE complex (Lis1, yellow; NudE, magenta).  
843 A dynein activating adaptor, BicD (purple), is also shown to illustrate the linkage of the  
844 dynein complex with a cargo. To note: other cargo adaptors instead of BicD, such as  
845 Spindly, HOOK1/3, ninein/ninein-like (NINL), and RAB11 family-interacting protein 3,  
846 can be used for dynein activation and cargo recruitment (not shown)<sup>2</sup>. BICDR1 and  
847 HOOK3 could recruit two dyneins for increased force and speed (not shown)<sup>2</sup>.

848 (B) Summary of oocyte growth phenotypes in listed genetic background (all with one  
849 copy of *maternal atub-Gal4<sup>V37J</sup>*). Classifications of oocyte growth phenotypes are  
850 included in Supplementary Figure 1A. *Dhc64C-RNAi* (#1) is the RNAi line used for all  
851 *Dhc64C-RNAi* experiments in this study.

852 (C-D'') Phalloidin and Orb staining in control (C-C'') and *Dhc64C-RNAi* (D-D'')  
853 ovarioles. Oocytes and Orb staining are highlighted with either yellow arrowheads and  
854 brackets (C-D and C''-D''), or with yellow painting (C'-D'). Scale bars, 50  $\mu$ m.

855 (E) Summary of the Orb staining phenotypes in stage 8 (left) and stage 9 (right) egg  
856 chambers in listed genotypes (all with one copy of *maternal atub-Gal4<sup>V37J</sup>*).

857 (F) Summary of oocyte growth phenotypes in *RNAi* lines against three listed dynein  
858 activating adaptors (all with one copy of *maternal atub-Gal4<sup>V37J</sup>*).

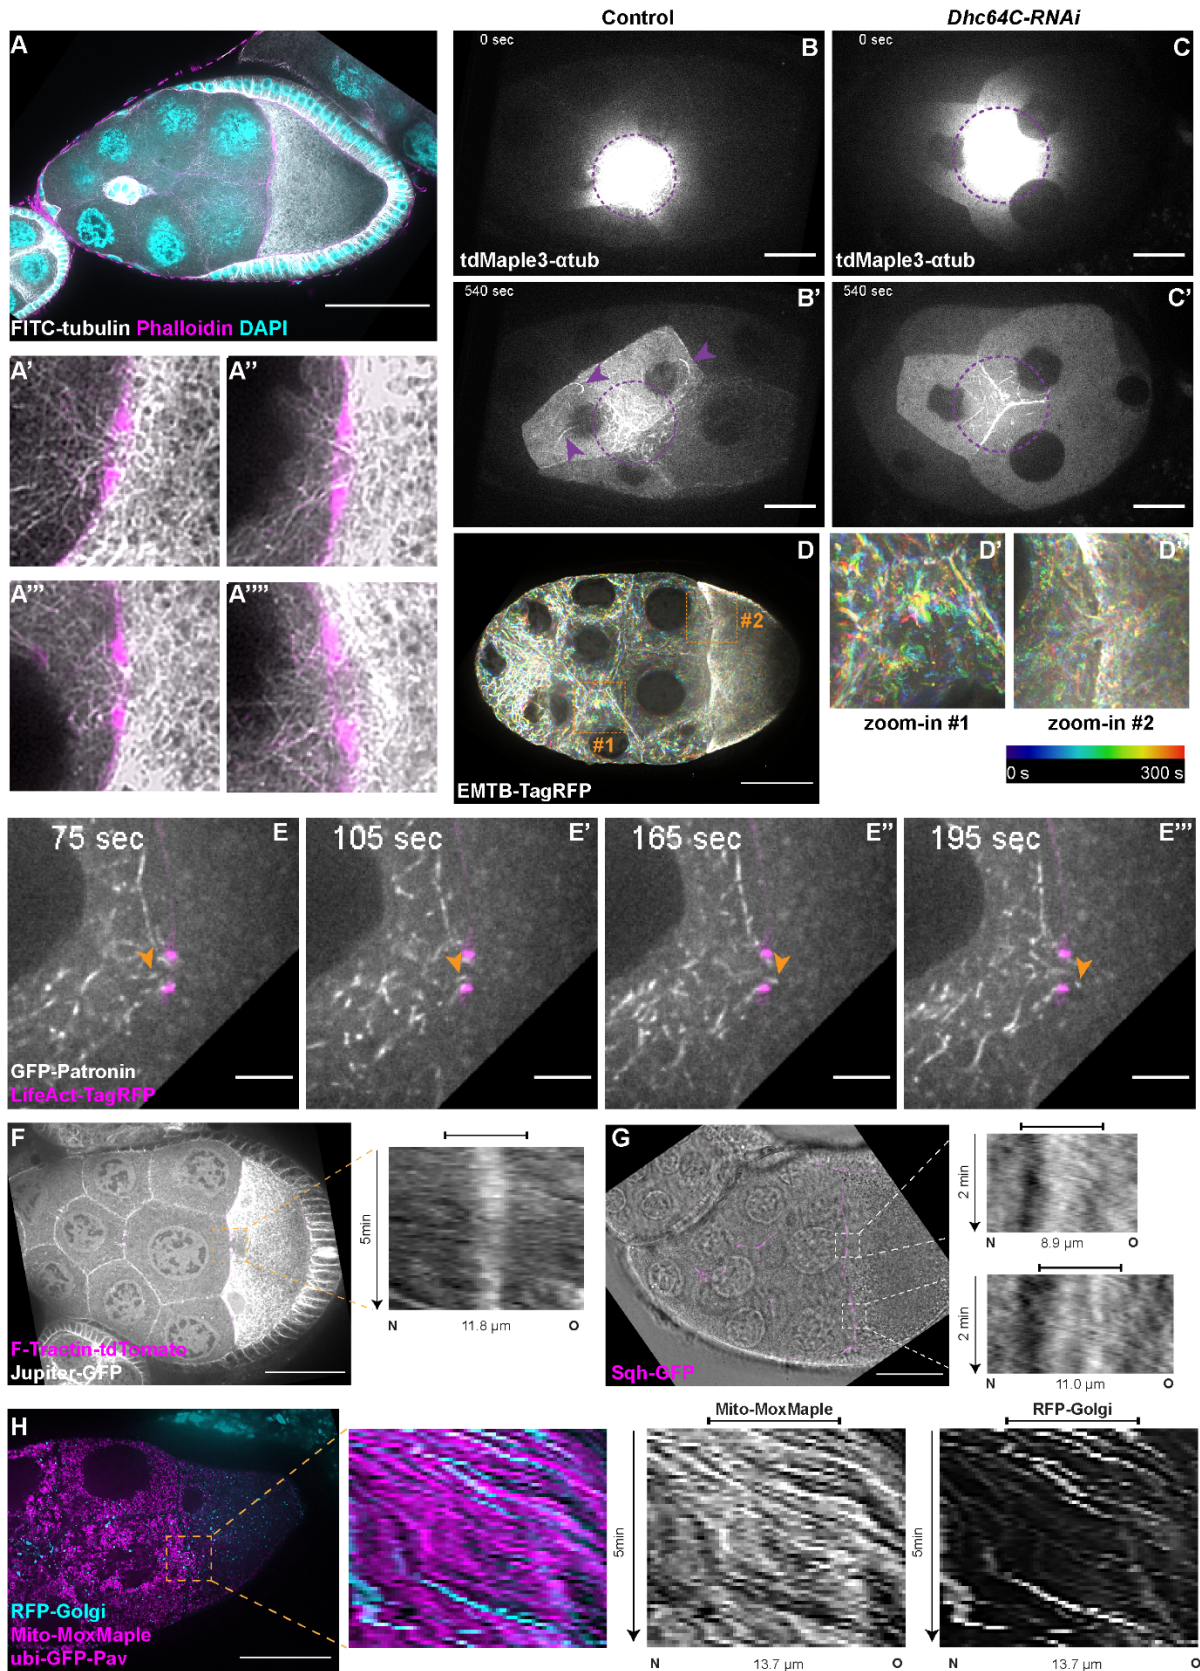

**Figure 2**

860 **Figure 2. Microtubule movement within nurse cells and from nurse cells to the**  
861 **oocyte.**

862 (A) Tubulin staining in a control stage 9 egg chamber. Microtubules can be seen in all  
863 four ring canals connecting nurse cells with the oocyte (A'-A'''). Ring canals are labeled  
864 with rhodamine-conjugated phalloidin. Scale bar, 50  $\mu\text{m}$ .

865 (B-C') Microtubule movement labeled with photoconverted tdMaple3- $\alpha\text{tub}$  in control and  
866 *Dhc64C-RNAi* nurse cells. Photoconversion area is highlighted with a dotted purple  
867 circle and microtubules outside of the photoconversion zone are highlighted with purple  
868 arrowheads. Scale bars, 20  $\mu\text{m}$ . See also Videos 1 and 5.

869 (D-D'') Microtubule movement is visualized by a 3XTagRFP-tagged microtubule binding  
870 domain of human Enscosin/MAP7 (EMTB-TagRFP). Temporal color-coded  
871 hyperstacks are used to show the microtubule movement in a whole egg chamber (D)  
872 and zoom-in areas of #1 within a nurse cell (D') and #2 in a nurse cell-oocyte ring canal  
873 (D''). Scale bar, 50  $\mu\text{m}$ . See also Video 2.

874 (E-E''') microtubule movement labeled with a GFP-tagged microtubule minus-end  
875 binding protein Patronin. The ring canal is labeled with LifeAct-TagRFP. One  
876 microtubule moving through the ring canal is highlighted with orange arrowheads. Scale  
877 bars, 10  $\mu\text{m}$ . See also Video 3.

878 (F) Microtubule movement is visualized by GFP protein trap line of an endogenous  
879 microtubule binding protein, Jupiter (Jupiter-GFP). The ring canal is labeled with F-  
880 Tractin-tdTomato. A kymograph of Jupiter-GFP in the nurse cell-oocyte ring canal (the  
881 dashed orange box) is used to show the microtubule movement from the nurse cell to

882 the oocyte. The capped line on top of the kymograph indicates the ring canal region.

883 Scale bar, 50  $\mu\text{m}$ . See also Video 4.

884 (G) Cytoplasmic flow is visualized by bright-field imaging. The ring canals are labeled  
885 with a GFP-tagged myosin-II light chain, Sqh-GFP. Kymographs of the two nurse cell-  
886 oocyte ring canals (the dashed white boxes) are used to show the cytoplasmic flow from  
887 the nurse cells to the oocyte. The capped lines on top of the kymographs indicate the  
888 ring canal regions. Scale bar, 50  $\mu\text{m}$ . See also Video 7.

889 (H) Bulk movement of two types of cargoes, mitochondria (magenta) and Golgi units  
890 (cyan), through the nurse cell-oocyte ring canal, labeled with GFP-Pav (magenta).

891 A kymograph of mitochondria and Golgi units in the nurse cell-oocyte ring canal (the  
892 dashed orange box) is used to show that both cargoes move at a similar speed through  
893 the ring canal to the oocyte. The capped line on top of the kymograph indicates the ring  
894 canal region. Scale bar, 50  $\mu\text{m}$ . See also Video 8.



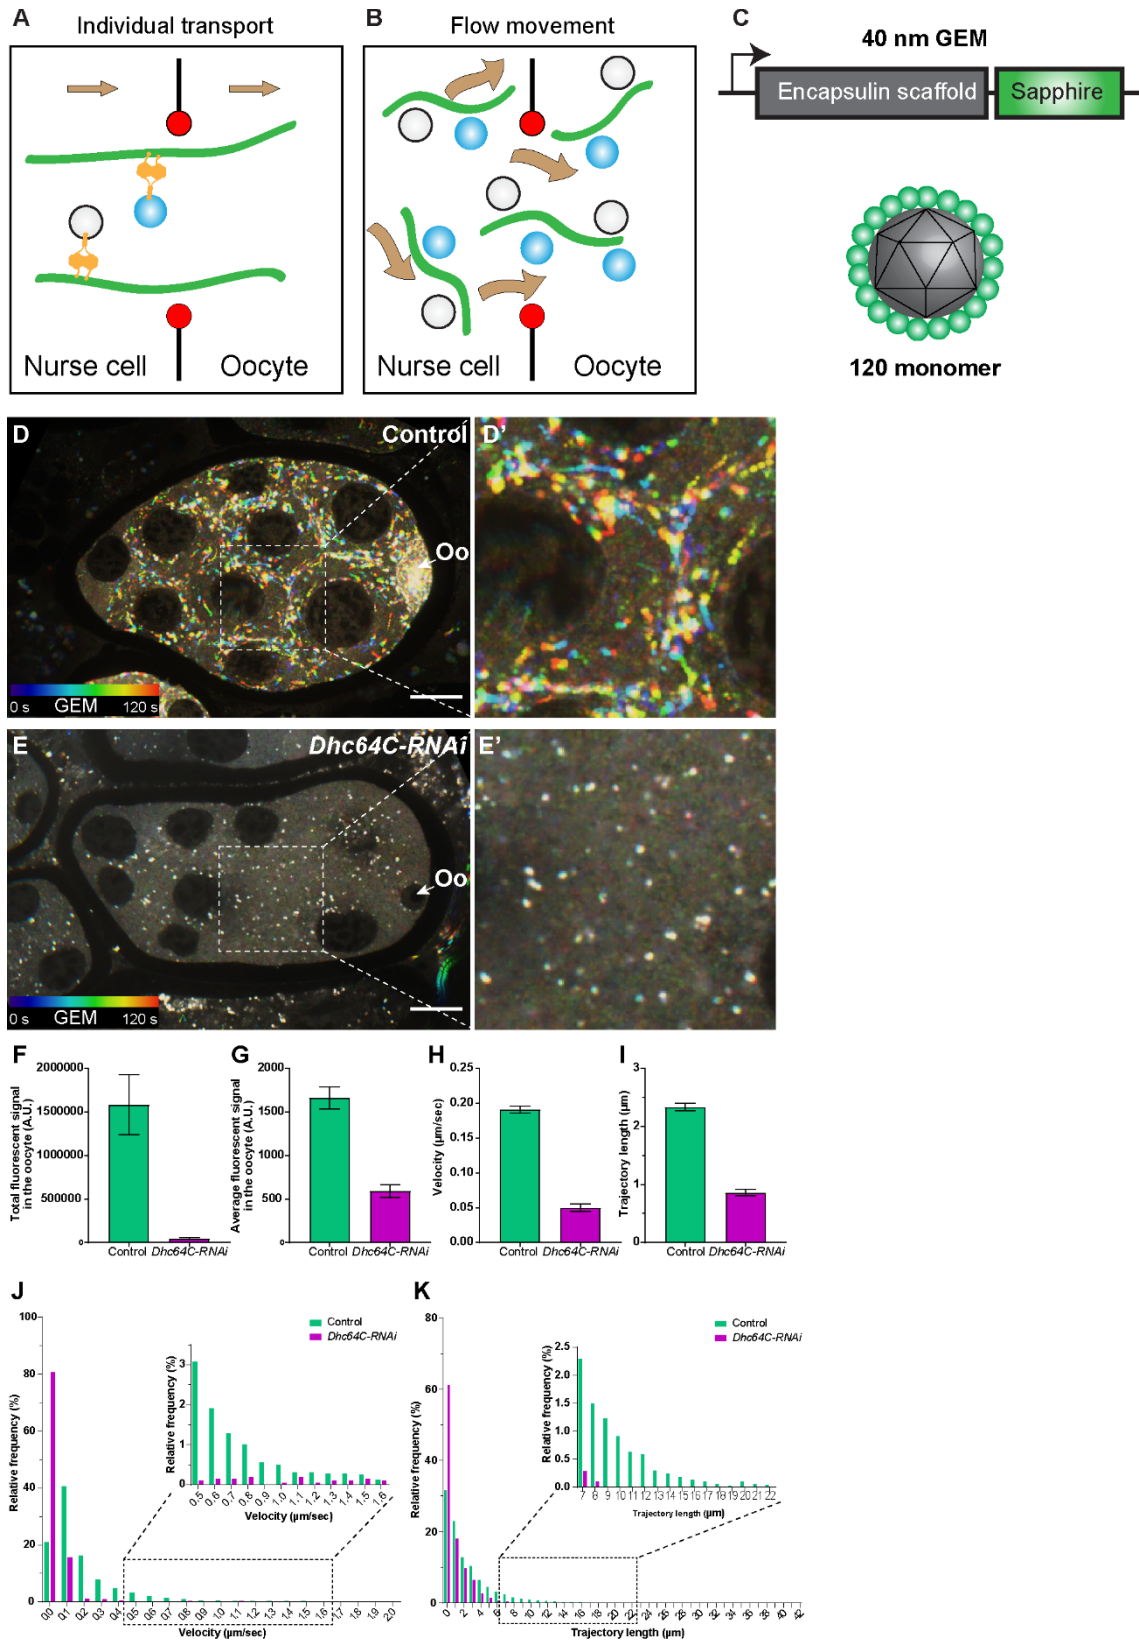

**Figure 3**

896 **Figure 3. Dynein-dependent GEM particle movement in ovaries.**

897 (A-B) Cartoon illustrations of two possible mechanisms of dynein-dependent cargo  
898 transfer from the nurse cell to the oocyte.

899 (C) A schematic illustration of the GEM construct. 120 copies of a sapphire-tagged  
900 *Pyrococcus furiosus* Encapsulin scaffold protein self-assemble into a 40 nm particle.

901 (D-E') Temporal color-coded hyperstacks of GEM particles in control (D-D') and  
902 *Dhc64C-RNAi* (E-E'). Oo, the oocyte. Scale bars, 20  $\mu$ m. See also Video 12.

903 (F-G) Quantification of total (F) and average (G) fluorescent intensities of GEM particles  
904 in control and *Dhc64C-RNAi*. The values shown in the graphs are mean  $\pm$  95%  
905 confidence intervals. (F) Control, N=22; *Dhc64C-RNAi*, N=27. Unpaired t test with  
906 Welch's correction between control and *Dhc64C-RNAi*:  $p < 0.0001$  (\*\*\*\*). (G) Control,  
907 N=22; *Dhc64C-RNAi*, N=27. Unpaired t test with Welch's correction between control  
908 and *Dhc64C-RNAi*:  $p < 0.0001$  (\*\*\*\*).

909 (H-K) Quantification of velocities (H, J) and trajectories (I, K) of GEM movement in  
910 control and *Dhc64C-RNAi*. The number of particles tracked: control, N=7656; *Dhc64C-*  
911 *RNAi*, N=2083. (H-I) The values shown in the graphs are mean  $\pm$  95% confidence  
912 intervals. (H) Unpaired t test with Welch's correction between control and *Dhc64C-*  
913 *RNAi*:  $p < 0.0001$  (\*\*\*\*). (I) Unpaired t test with Welch's correction between control and  
914 *Dhc64C-RNAi*:  $p < 0.0001$  (\*\*\*\*). (J-K) Histograms of velocities (J) and trajectories (K) of  
915 GEM movement in control and *Dhc64C-RNAi* (the same set of data used in H-I).

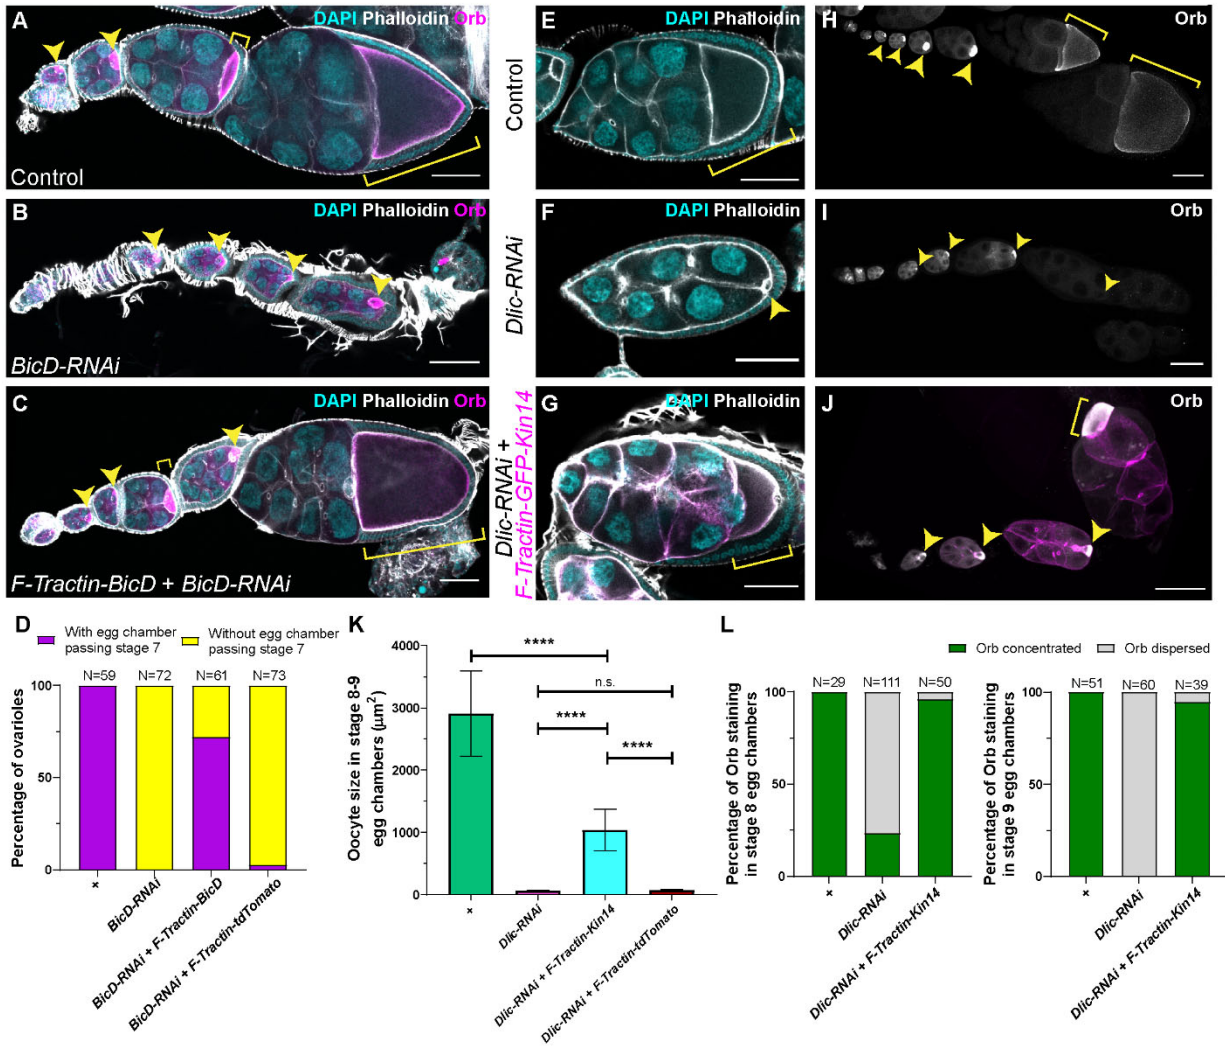

## Figure 4

916

917 **Figure 4. A cortically-anchored minus-end motor is sufficient for oocyte growth.**

918 (A-C) Oocyte growth defect in *BicD-RNAi* is rescued by a cortically-restricted BicD

919 construct. (D) Summary of percentages of ovarioles with and without egg chamber(s)

920 passing stage 7.

921 (E-J) The defects of oocyte growth and Orb concentration in *Dlic-RNAi* are rescued by a

922 cortically recruited plant kin14 (Kin14V1b) construct. Phalloidin and DAPI staining (E-G)

923 or Orb staining (H-J) in control (E, H), *Dlic-RNAi* (F, I) and *Dlic-RNAi* rescued by F-  
924 tractin-GFP-Kin14 (G, J).

925 (K) Quantification of oocyte size in stage 8~9 egg chambers in listed genotypes. The  
926 values shown in the graph are mean  $\pm$  95% confidence intervals. Control, N=40; *Dlic-*  
927 *RNAi*, N=49; *Dlic-RNAi + F-Tractin-Kin14*, N=33; *Dlic-RNAi + F-Tractin-tdTomato*,  
928 N=42. Unpaired t test with Welch's correction were performed in following groups:  
929 between control and *Dlic-RNAi*,  $p < 0.0001$  (\*\*\*\*); between Control and *Dlic-RNAi + F-*  
930 *Tractin-Kin14*,  $p < 0.0001$  (\*\*\*\*); between Control and *Dlic-RNAi + F-Tractin-tdTomato*,  
931  $p < 0.0001$  (\*\*\*\*); between *Dlic-RNAi* and *Dlic-RNAi + F-Tractin-Kin14*,  $p < 0.0001$  (\*\*\*\*);  
932 between *Dlic-RNAi* and *Dlic-RNAi + F-Tractin-tdTomato*,  $p = 0.2107$  (n.s.); between *Dlic-*  
933 *RNAi + F-Tractin-Kin14* and *Dlic-RNAi + F-Tractin-tdTomato*,  $p < 0.0001$  (\*\*\*\*).

934 (L) Summary of Orb staining phenotypes in stage 8 (left) and stage 9 (right) egg  
935 chambers in listed genotypes.

936 Oocytes are highlighted with either yellow arrowheads or yellow brackets. All listed  
937 genotypes carried one copy of *maternal atub-Gal4<sup>[V37]</sup>*. Scale bars, 50 $\mu$ m.

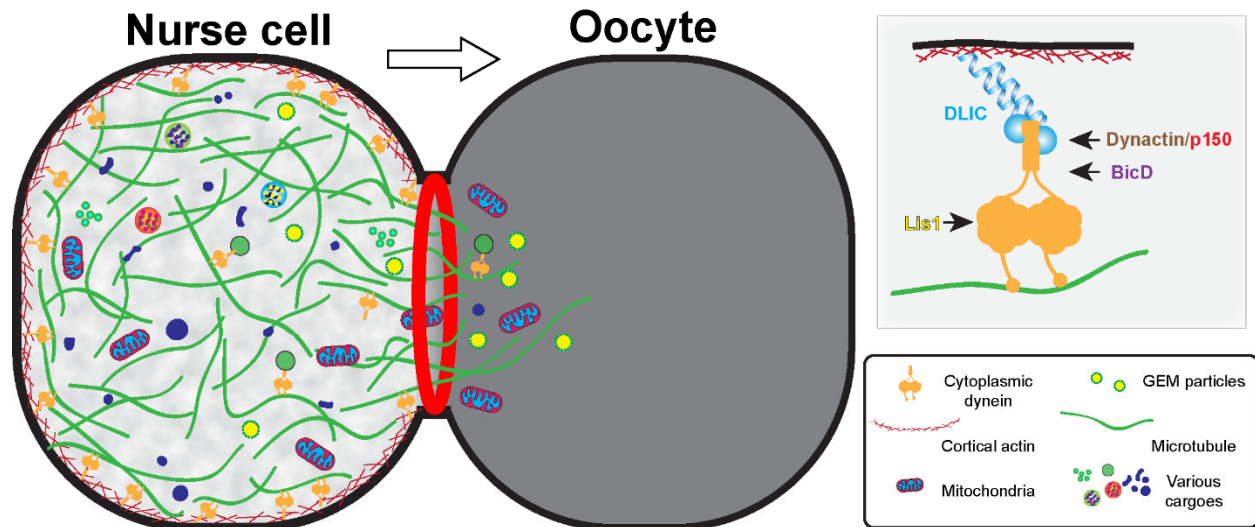

## Figure 5

938

939

**Figure 5. The model of cortically anchored dynein transferring cytoplasmic**

940

**contents to the growing oocyte via gliding microtubules. Dynein light intermediate**

941

chain (Dlic) bridges dynein heavy chain to the cell cortex, while the Dynactin/p150

942

complex, BicD and Lis1 are required for activation of cytoplasmic dynein. In addition to

943

the bulk cytoplasmic flow, dynein-dependent individual cargo transport on microtubules

944

may also contribute to the nurse cell-to-oocyte transfer and oocyte growth. See also

945

Video 15.

946

947 **Supplementary figures and figure legends**

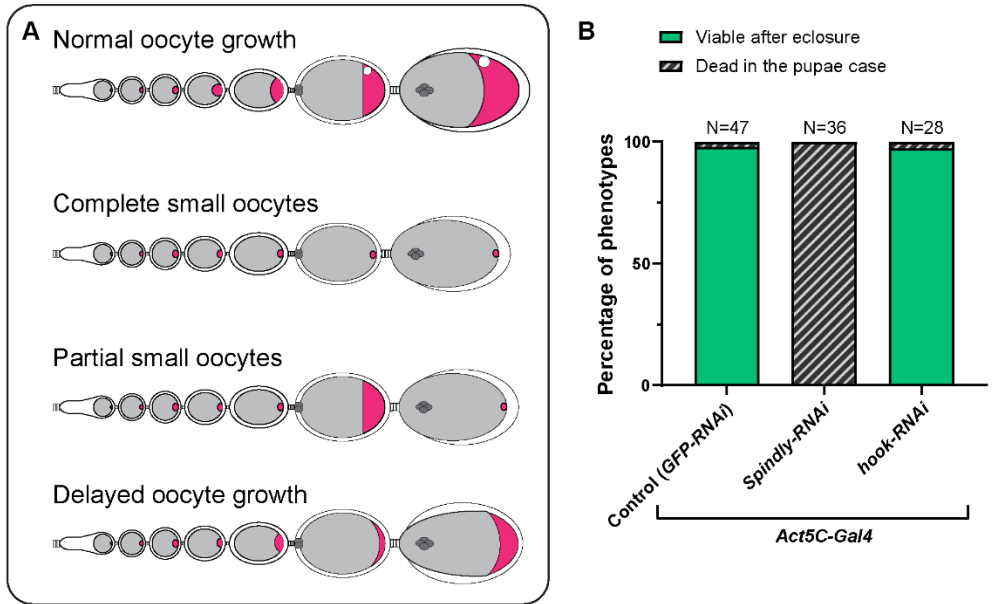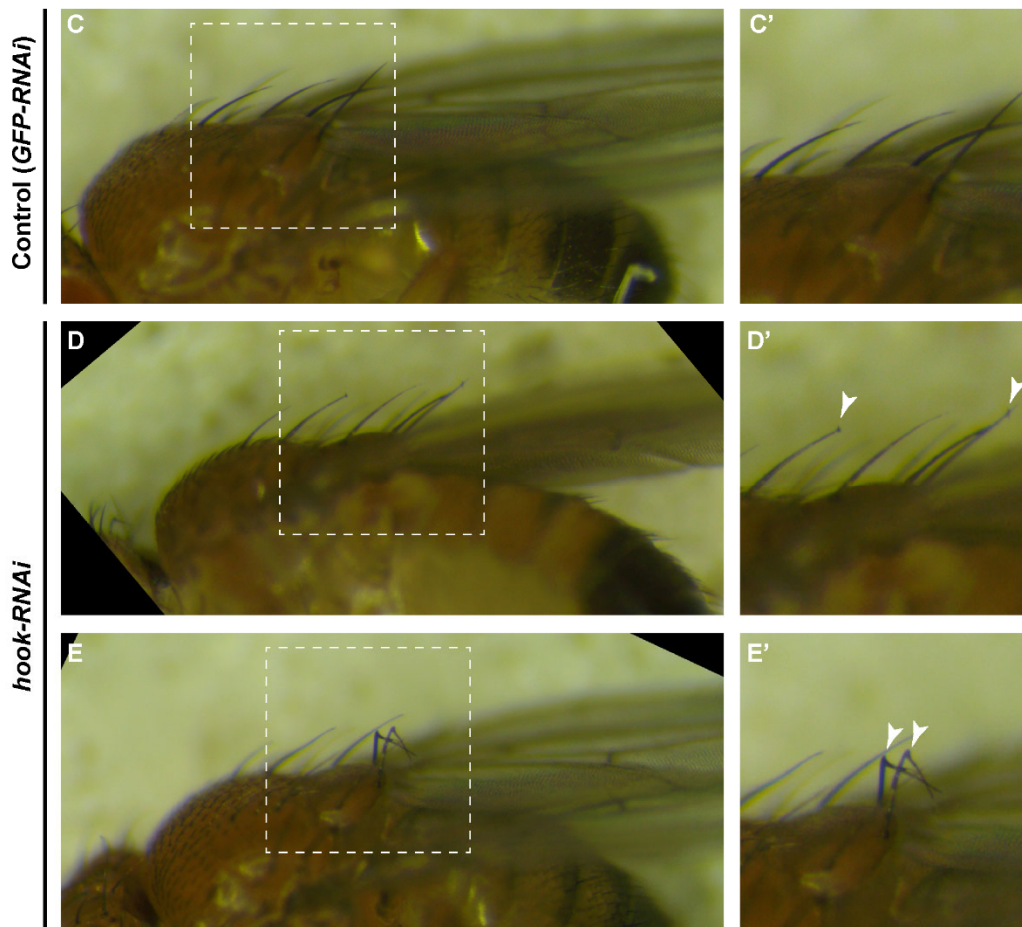

948 **Supplementary Figure 1**

948

949

950 **Supplementary Figure 1. Summary of dynein-related RNAi phenotypes. Related to**  
951 **Figure 1.**

952 (A) A Cartoon illustration of oocyte growth phenotypes (oocytes are highlighted in  
953 magenta): (1) normal oocyte growth: all egg chambers in the single ovariole have  
954 normal-sized oocytes according to the stages; (2) complete small oocytes: oocyte  
955 growth is completely arrested throughout the stages, (3) partial small oocyte growth:  
956 some egg chambers display oocyte growth arrest, while others have normal-size  
957 oocytes in the same ovariole; (4) delayed oocyte growth: oocyte size is smaller  
958 compared to wild-type at certain stages.

959 (B) Viability assay (from pupae to adults) in listed genotypes. As the *Act5C-Gal4*  
960 transgene is balanced with a TM6B (Tb) balancer, only non-Tb pupae were selected for  
961 this assay.

962 (C-E') Bristle phenotypes in control (C) and in *hook-RNAi* (D-E) male adults. Control  
963 and *hook-RNAi* are of the same genotypes as (B). Mild (D) and severe (E) hooked  
964 bristle phenotypes are seen in *Act5C>hook-RNAi* flies.

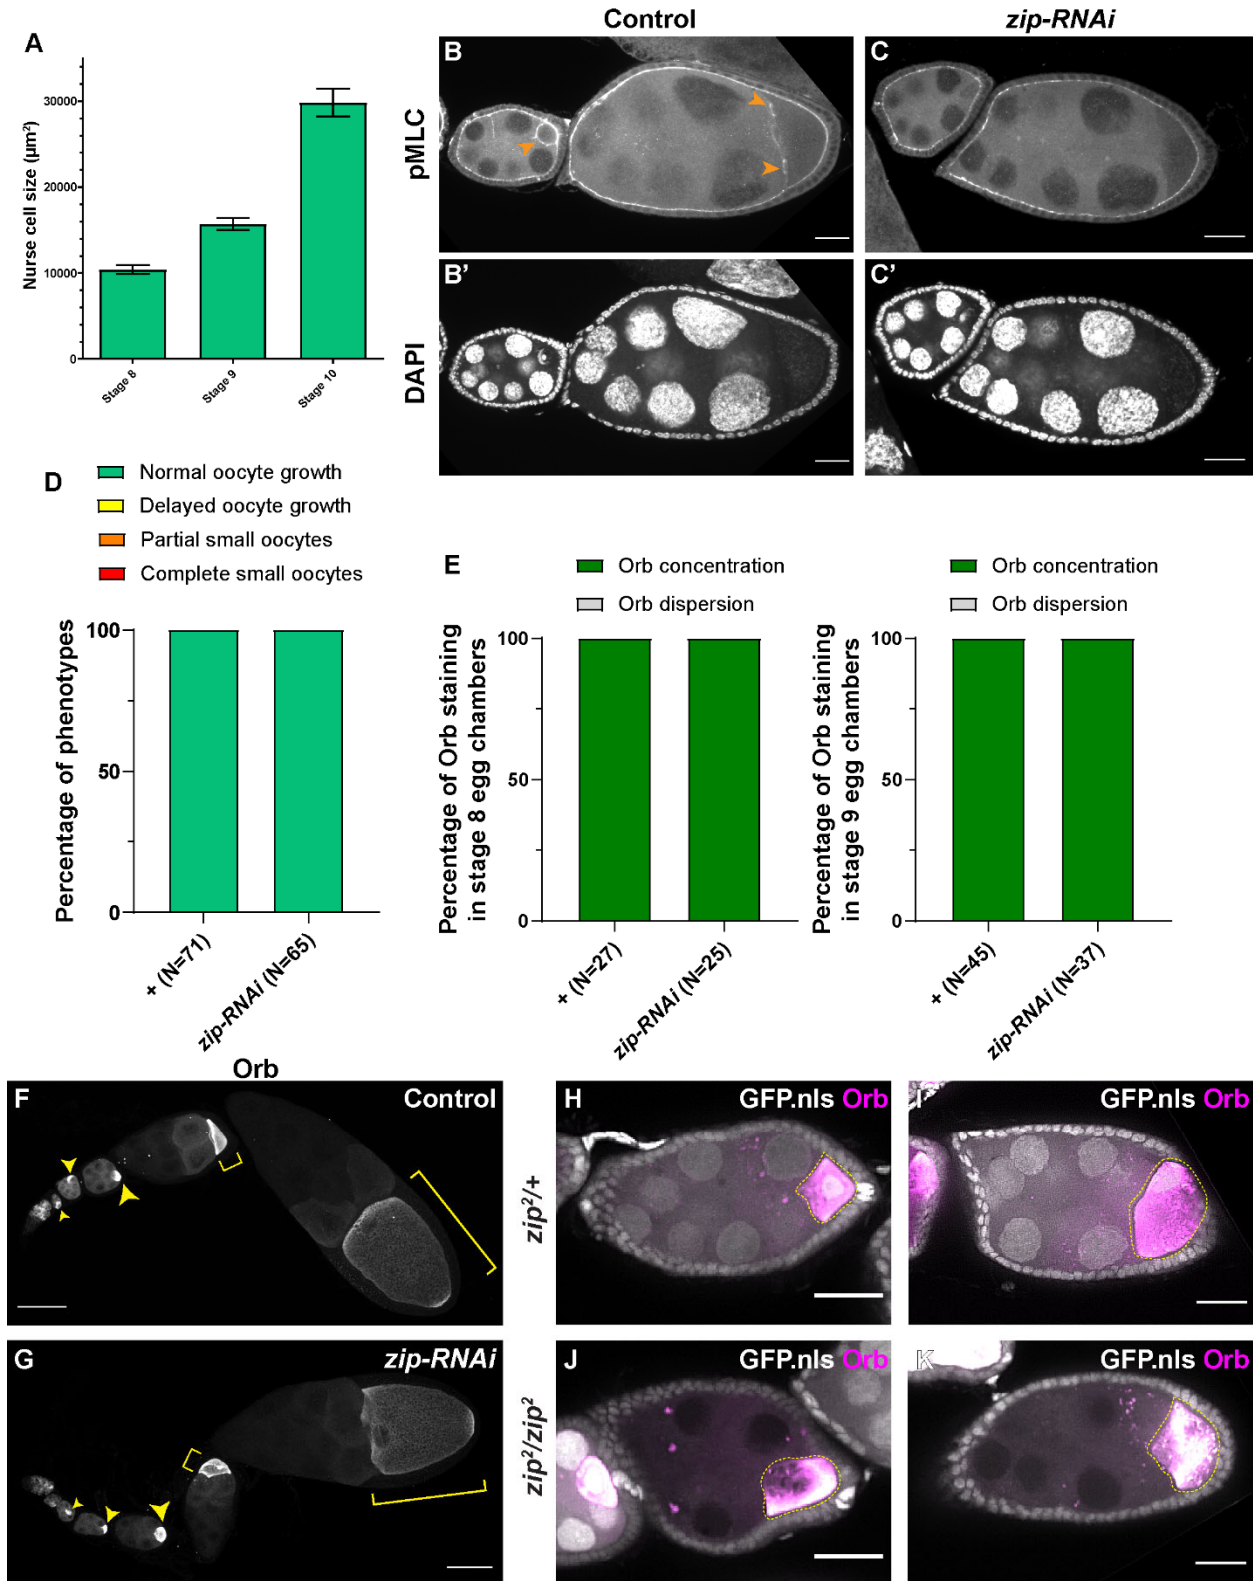

## Supplementary Figure 2



966 **Supplementary Figure 2. Myosin-II activity is dispensable for oocyte growth**  
967 **during mid-oogenesis. Related to Figure 2.**

968 (A) Nurse cell size in stage 8 to stage 10 egg chambers. Stage 8, N=13; stage 9, N=23;  
969 stage 10, N=14.

970 (B-C') Phospho-myosin-II light chain (pMLC) antibody staining in control and in *zip-RNAi*  
971 samples. The pMLC staining between the nurse cells and the oocytes is abolished in  
972 *zip-RNAi* (C), compared to control (B, pointed with orange arrowheads). To note, the  
973 pMLC staining at the apical side of the somatic follicle cells are not affected by the  
974 germline knockdown of *zip-RNAi* and serves as an internal control of the antibody  
975 staining. Scale bars, 20  $\mu\text{m}$ .

976 (D-E) Summaries of oocyte growth phenotypes (D) and Orb staining phenotypes (E) in  
977 control and in *zip-RNAi*. Both control and *zip-RNAi* carry one copy of *maternal atub-*  
978 *Gal4<sup>[V37]</sup>*.

979 (F-G) Characteristic Orb staining in control (F) and *zip-RNAi* (G) ovarioles. Oocytes are  
980 highlighted with either yellow arrowheads or yellow brackets. Scale bars, 50 $\mu\text{m}$ . Both  
981 samples carry one copy of *maternal atub-Gal4<sup>[V37]</sup>*.

982 (H-K) Orb staining in *zip<sup>2</sup>* heterozygous (H-I) and homozygous (J-K, marked with the  
983 absence of nuclear-localized GFP signal) egg chambers. Among 46 *zip<sup>2</sup>* homozygous  
984 egg chambers examined, 28 egg chambers have proper oocyte specification (shown by  
985 Orb concentration). 25 out 28 *zip<sup>2</sup>* homozygous egg chambers display no major growth  
986 defects in mid-oogenesis. To note: Orb staining becomes chunky and less evenly  
987 localized in the *zip<sup>2</sup>* homozygous oocytes. Scale bars, 50  $\mu\text{m}$ .

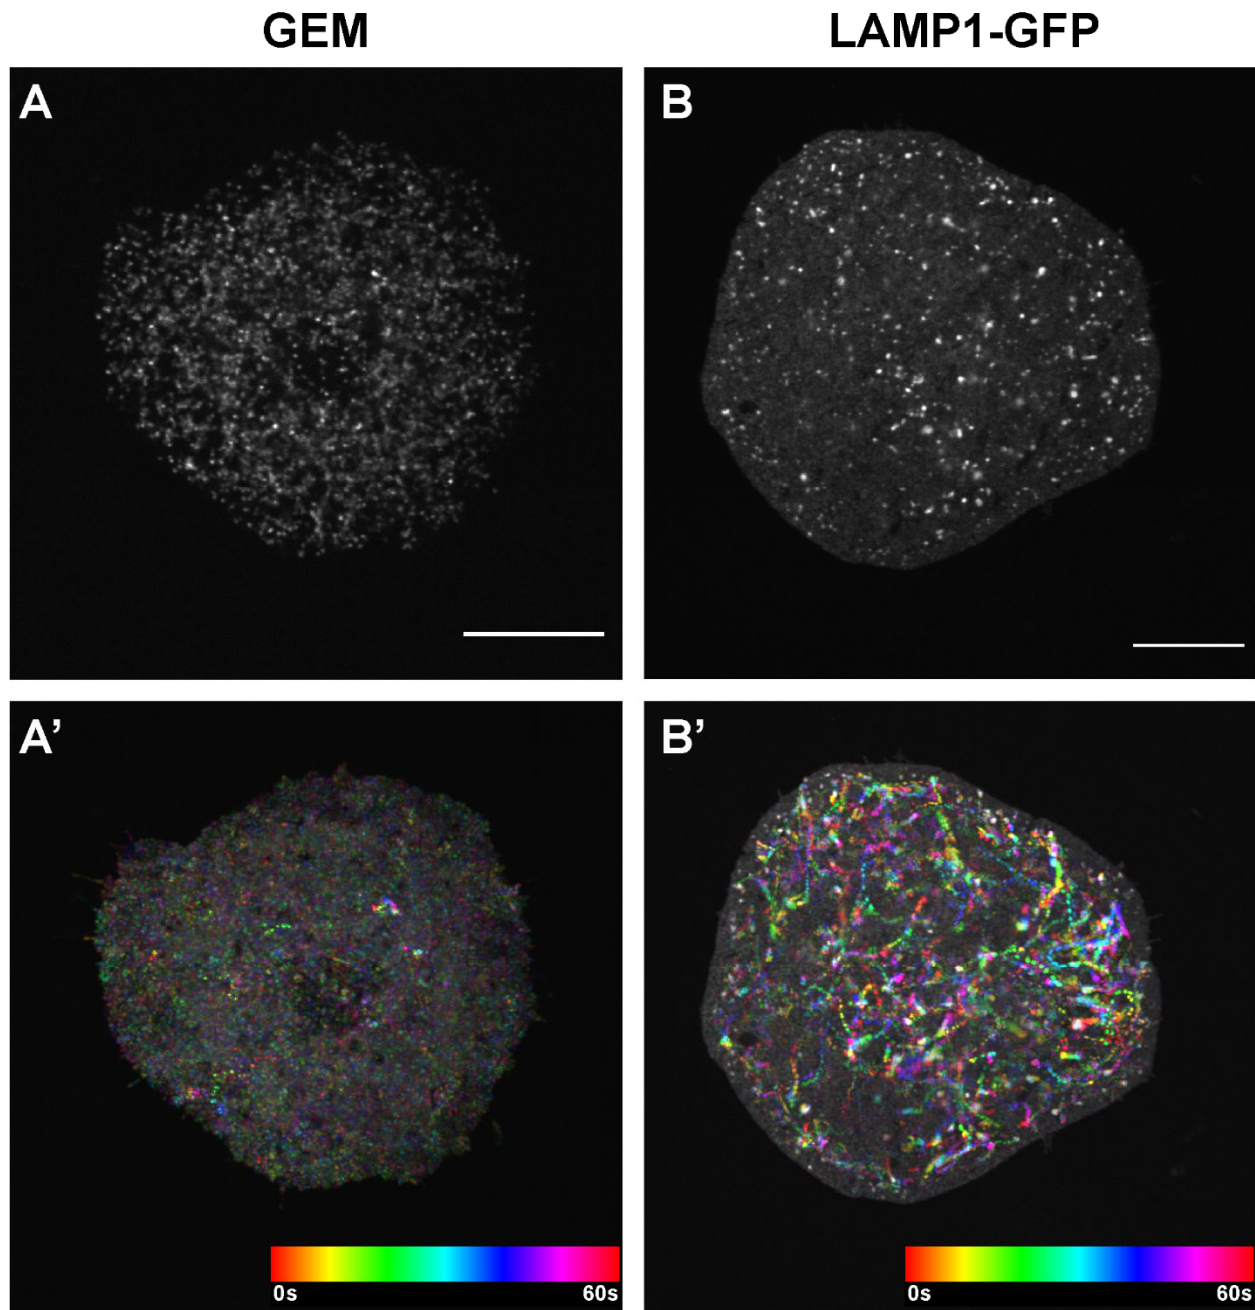

## Supplementary Figure 3

988

989

990 **Supplementary Figure 3. GEMs and lysosomes in *Drosophila* S2R+ cells. Related**

991 **to Figure 3.**

992 Single frame images (A-B) and temporal color-coded hyperstacks (A'-B') of GEM  
993 particles (labeled with pAC-Gal4+pUASp-GEM) (A-A') and lysosomes (labeled with  
994 pAC-LAMP1-GFP) (B-B') in *Drosophila* S2R+ cells on Concanavalin-A coated  
995 coverslips. Scale bars, 10  $\mu\text{m}$ .

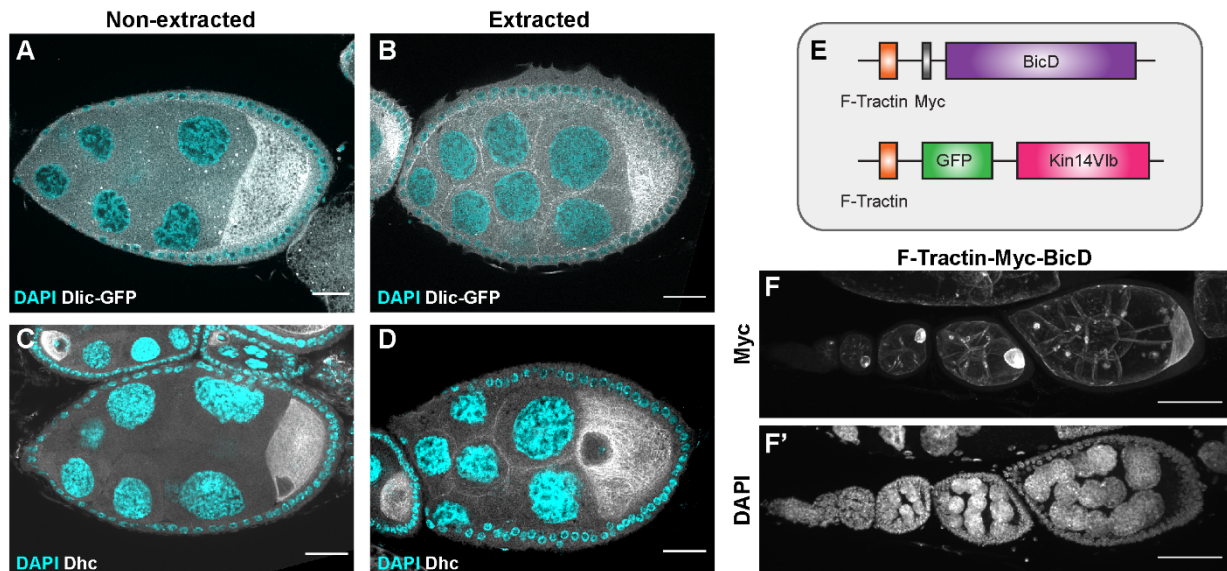

## Supplementary Figure 4

996

997 **Supplementary Figure 4. The recruitment of dynein to nurse cell cortex. Related**  
998 **to Figure 4.**

999 (A-D) Dlic-GFP under its endogenous promoter (A-B) and DHC antibody staining (C-D)  
1000 in non-extracted (A, C) and extracted (B, D) samples. After extraction, both Dlic-GFP  
1001 and Dhc staining show clear cortical localization in nurse cells. Scale bars, 20  $\mu$ m.

1002 (E) A schematic illustration of the cortically-recruited BicD and kin14 constructs.

1003 (F-F') F-Tractin-Myc-BicD is predominantly localized to the cell cortex. The expression  
1004 is driven by one copy of *maternal atub-Gal4<sup>[V37]</sup>*. Scale bars, 50  $\mu$ m.

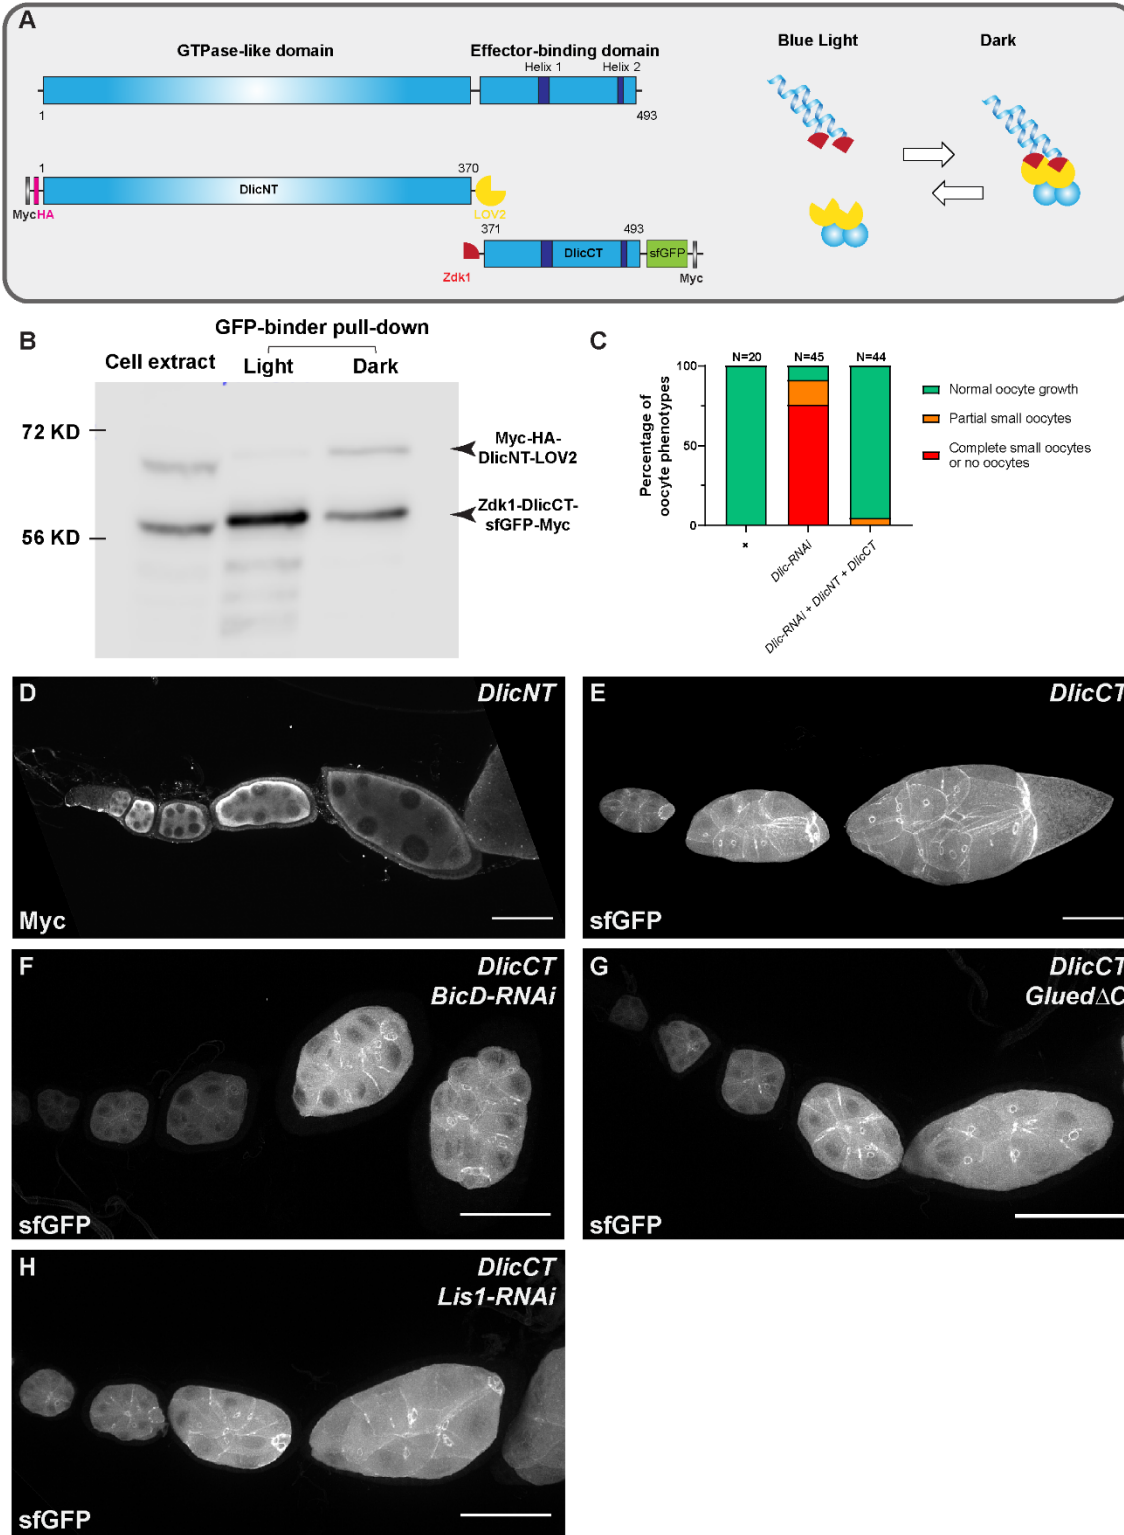

1005

## Supplementary Figure 5

1006 **Supplementary Figure 5. Dlic C-terminus is sufficient for targeting to nurse cell**  
1007 **cortex. Related to Figure 5.**

1008 (A) A schematic illustration of *Drosophila* Dlic and Dlic truncations (DlicNT and DlicCT).  
1009 C-terminus of DlicNT and N-terminus of DlicCT are tagged with the LOVTRAP probes,  
1010 LOV2 and Zdk1, respectively. LOV2 interacts with Zdk11 in dark, and dissociates from  
1011 Zdk1 in the presence of blue light.

1012 (B) Zdk1-DlicCT interacts with DlicNT-LOV2 in dark. GFP-binder was used to pull down  
1013 Zdk1-DlicCT in cell extracts from HEK293 cells expressing both DlicNT and DlicCT  
1014 constructs, and anti-Myc antibody was used to probe for Dlic truncations. Lane 1: cell  
1015 extract; Lane 2: GFP-binder pulldown sample in light; lane 3; GFP-binder pulldown  
1016 sample in dark.

1017 (C) Coexpression of DlicNT and DlicCT reuses the oogenesis defects caused by *Dlic-*  
1018 *RNAi*. The expression is driven by one copy of *nos-Gal4<sup>[VP16]</sup>*.

1019 (D) DlicNT localization in the germ line. The expression is driven by one copy of  
1020 *maternal atub-Gal4<sup>[V37]</sup>*. A small Z-projection (~5  $\mu\text{m}$ ) is used to show the DlicNT  
1021 localization. To note: overexpression of DlicNT driven by *maternal atub-Gal4<sup>[V37]</sup>* results  
1022 in delayed oocyte growth. Scale bar, 50  $\mu\text{m}$ .

1023 (E-H) DlicCT localizations in control (E), *BicD-RNAi* (F), Dynactin/p150 inhibited  
1024 (*Glued $\Delta$ C*, G) and *Lis1-RNAi* (H) egg chambers. Whole ovariole z-projections (30 ~ 40  
1025  $\mu\text{m}$ ) are used to show the DlicCT cortical localization. The numbers of ovarioles  
1026 examined: Control, N=28; *BicD-RNAi*, N=39; *Glued $\Delta$ C*, N=30; *Lis1-RNAi*, N=29. All  
1027 listed genotypes are with one copy of *maternal atub-Gal4<sup>[V37]</sup>*. Scale bars, 50  $\mu\text{m}$ .

1029 **Videos**

1030 **Video 1.** Microtubule movement (labeled with locally photoconverted tdMaple3-atub,  
1031 red) in control nurse cells. Scale bars, 20  $\mu\text{m}$ . Related to Figure 2.

1032

1033 **Video 2.** Microtubules labeled with ectopically-expressed TagRFP-tagged human  
1034 MAP7/Ensconsin microtubule binding domain (EMTB-3XTagRFP) move in nurse cells  
1035 and through the nurse cell-oocyte ring canal (labeled with GFP-Pav in magenta). Scale  
1036 bar, 50  $\mu\text{m}$ . Related to Figure 2.

1037

1038 **Video 3.** Microtubules labeled with ectopically-expressed GFP-tagged minus-end  
1039 binding protein, Patronin (GFP-Patronin) move in nurse cells and from the nurse cell to  
1040 the oocyte through the ring canal (labeled with LifeAct-TagRFP in magenta). Scale bar,  
1041 50  $\mu\text{m}$ . Related to Figure 2.

1042

1043 **Video 4.** Microtubules labeled with a GFP-tagged endogenous microtubule-associated  
1044 protein Jupiter (Jupiter-GFP) in nurse cells and in the nurse cell-oocyte ring canal  
1045 (labeled with F-Tractin-tdTomato in magenta). Scale bar, 50  $\mu\text{m}$ . Related to Figure 2.

1046

1047 **Video 5.** No microtubule movement (labeled with locally photoconverted tdMaple3-atub,  
1048 red) in *Dhc64C-RNAi* nurse cells, compared to control. Scale bars, 20  $\mu\text{m}$ . Related to  
1049 Figure 2.

1050

1051 **Video 6.** Microtubule movement (labeled with a GFP-tagged endogenous MAP, Jupiter-  
1052 GFP) in nurse cell-oocyte ring canals (labeled with GFP-Pav) in control, *zip-RNAi* and  
1053 *Dhc64C-RNAi*. Scale bars, 10  $\mu\text{m}$ . Related to Figure 2.

1054

1055 **Video 7.** Cytoplasmic flow from the nurse cells to the oocyte through ring canals  
1056 (labeled with Sqh-GFP in magenta). Scale bar, 50  $\mu\text{m}$ . Related to Figure 2.

1057

1058 **Video 8.** Bulk movement of mitochondria (labeled with Mito-MoxMaple3, without  
1059 photoconversion, magenta) and Golgi units (labeled with RFP-Golgi, cyan) through the  
1060 nurse cell-to-oocyte ring canal (labeled with GFP-Pav, magenta) in a stage 9 egg  
1061 chamber. Scale bars, 50  $\mu\text{m}$ . Related to Figure 2.

1062

1063 **Video 9.** Mitochondria movement (labeled with Mito-MoxMaple3, after global  
1064 photoconversion, gray) in control, *zip-RNAi* and *Dhc64C-RNAi*. Ring canals are labeled  
1065 with GFP-Pav (magenta); Scale bars, 50  $\mu\text{m}$ . Related to Figure 2.

1066

1067 **Video 10.** Mitochondria movement (labeled with Mito-MoxMaple3, without  
1068 photoconversion, left) and microtubule movement (labeled with EMTB-3XTagRFP, right)  
1069 in nurse cell-oocyte ring canals (labeled with GFP-Pav, left). Scale bars, 50  $\mu\text{m}$  in whole  
1070 egg chambers, and 10  $\mu\text{m}$  in zoom-in ring canals, respectively. Related to Figure 3.



1071

1072 **Video 11.** The movement of Golgi units (labeled with RFP-Golgi, left) and microtubules  
1073 (labeled with Jupiter-GFP, right) in nurse cell-oocyte ring canals (labeled with F-  
1074 Traction-tdTomato, left). Scale bars, 50  $\mu\text{m}$  in whole egg chambers, and 10  $\mu\text{m}$  in  
1075 zoom-in ring canals, respectively. Related to Figure 3.

1076

1077 **Video 12.** GEM particles in a control egg chamber and in a *Dhc64C-RNAi* egg  
1078 chamber. Scale bars, 20  $\mu\text{m}$ . Related to Figure 3.

1079

1080 **Video 13.** GEM particles transport through a nurse cell-oocyte ring canal (labeled with  
1081 F-Tractin-tdTomato, magenta) in control. Scale bar, 10  $\mu\text{m}$ . Related to Figure 3.

1082

1083 **Video 14.** Mitochondria movement (labeled with Mito-MoxMaple3, after global  
1084 photoconversion) in the nurse cell-oocyte ring canals of control, *Dlic-RNAi* and *Dlic-*  
1085 *RNAi* + F-Tractin-GFP-Kin14Vlb rescued samples. Ring canals are either labeled with  
1086 GFP-Pav (in control and *Dlic-RNAi* samples) or F-Tractin-GFP-Kin14Vlb (in the *Dlic-*  
1087 *RNAi* + F-Tractin-GFP-Kin14Vlb rescued sample), in magenta. Scale bars, 20  $\mu\text{m}$ .  
1088 Related to Figure 4.

1089

1090 **Video 15.** Cortical dynein glides microtubules and transfers cytoplasm to the *Drosophila*  
1091 oocyte. Related to Figure 5.
